# Supplementary material for: Predictive value of FCGBP expression for treatment response and survival in rectal cancer patients undergoing chemoradiotherapy
Source: Aging (Albany NY). 2024 May 3;16(9):7889–901. doi: 10.18632/aging.205791 (PMC11131975; doi:10.18632/aging.205791)
Supplement: Supplementary Table 2 [file aging-16-205791-s002.xlsx]

## Sheet: MF
Supplementary Table 2. Association of FCGBP expression and genes of epithelial structure maintenance, flavonoid metabolic process, and response to gamma radiation.
pathways	rho	q.value
GOMF_MELANOCORTIN_RECEPTOR_BINDING	0.791304	0
GOMF_UDP_GALACTOSE_BETA_N_ACETYLGLUCOSAMINE_BETA_1_3_GALACTOSYLTRANSFERASE_ACTIVITY	0.750725	1.00728e-06
GOMF_SYNTAXIN_BINDING	0.744681	1.48389e-06
GOMF_SYNTAXIN_1_BINDING	0.742831	1.65018e-06
GOMF_CHOLINE_TRANSMEMBRANE_TRANSPORTER_ACTIVITY	0.741351	1.79092e-06
GOMF_CALCIUM_DEPENDENT_PHOSPHOLIPASE_A2_ACTIVITY	0.734813	2.50613e-06
GOMF_ARYL_SULFOTRANSFERASE_ACTIVITY	0.730126	3.13071e-06
GOMF_NAD_RETINOL_DEHYDROGENASE_ACTIVITY	0.728153	3.42719e-06
GOMF_UREA_TRANSMEMBRANE_TRANSPORTER_ACTIVITY	0.723959	4.13431e-06
GOMF_PYRIMIDINE_NUCLEOTIDE_SUGAR_TRANSMEMBRANE_TRANSPORTER_ACTIVITY	0.723096	4.29432e-06
GOMF_URIDYLYLTRANSFERASE_ACTIVITY	0.721739	4.5567e-06
GOMF_TOXIC_SUBSTANCE_BINDING	0.720259	4.85906e-06
GOMF_POLYPEPTIDE_N_ACETYLGALACTOSAMINYLTRANSFERASE_ACTIVITY	0.706815	8.60343e-06
GOMF_1_ACYLGLYCEROPHOSPHOCHOLINE_O_ACYLTRANSFERASE_ACTIVITY	0.698304	1.23177e-05
GOMF_ALCOHOL_DEHYDROGENASE_NAD_P_PLUS_ACTIVITY	0.693987	1.47903e-05
GOMF_ALPHA_N_ACETYLGALACTOSAMINIDE_ALPHA_2_6_SIALYLTRANSFERASE_ACTIVITY	0.693124	1.53431e-05
GOMF_MYRISTOYLTRANSFERASE_ACTIVITY	0.69115	1.6688e-05
GOMF_BETA_1_3_GALACTOSYLTRANSFERASE_ACTIVITY	0.689917	1.75895e-05
GOMF_XMP_5_NUCLEOSIDASE_ACTIVITY	0.68856	1.86394e-05
GOMF_HYDROLASE_ACTIVITY_HYDROLYZING_O_GLYCOSYL_COMPOUNDS	0.687573	1.94433e-05
GOMF_PYRUVATE_TRANSMEMBRANE_TRANSPORTER_ACTIVITY	0.685723	2.10483e-05
GOMF_AMINE_TRANSMEMBRANE_TRANSPORTER_ACTIVITY	0.681406	2.5345e-05
GOMF_POLYOL_TRANSMEMBRANE_TRANSPORTER_ACTIVITY	0.679186	2.78955e-05
GOMF_GLYCEROL_CHANNEL_ACTIVITY	0.677829	2.9582e-05
GOMF_CALCIUM_DEPENDENT_CYSTEINE_TYPE_ENDOPEPTIDASE_ACTIVITY	0.677089	3.05455e-05
GOMF_2_ACYLGLYCEROL_3_PHOSPHATE_O_ACYLTRANSFERASE_ACTIVITY	0.674622	3.39944e-05
GOMF_ORGANIC_HYDROXY_COMPOUND_TRANSMEMBRANE_TRANSPORTER_ACTIVITY	0.673759	3.52931e-05
GOMF_INORGANIC_MOLECULAR_ENTITY_TRANSMEMBRANE_TRANSPORTER_ACTIVITY	0.671415	3.90777e-05
GOMF_QUINONE_BINDING	0.670799	4.01403e-05
GOMF_SALT_TRANSMEMBRANE_TRANSPORTER_ACTIVITY	0.670799	4.01403e-05
GOMF_GABA_RECEPTOR_BINDING	0.667222	4.69049e-05
GOMF_CYSTEINE_TYPE_ENDOPEPTIDASE_ACTIVITY_INVOLVED_IN_APOPTOTIC_PROCESS	0.662905	5.66135e-05
GOMF_METAL_ION_TRANSMEMBRANE_TRANSPORTER_ACTIVITY	0.661918	5.9101e-05
GOMF_NEUROPEPTIDE_BINDING	0.656244	7.5663e-05
GOMF_ISOPRENOID_BINDING	0.655751	7.73037e-05
GOMF_HYDROLASE_ACTIVITY_ACTING_ON_GLYCOSYL_BONDS	0.655381	7.85573e-05
GOMF_MONOCARBOXYLIC_ACID_BINDING	0.655381	7.85573e-05
GOMF_P_TYPE_CALCIUM_TRANSPORTER_ACTIVITY	0.64909	0.000103196
GOMF_CHANNEL_REGULATOR_ACTIVITY	0.648597	0.000105421
GOMF_C_PALMITOYLTRANSFERASE_ACTIVITY	0.645637	0.000119788
GOMF_SODIUM_BICARBONATE_SYMPORTER_ACTIVITY	0.645513	0.000120426
GOMF_GALACTOSIDE_BINDING	0.644773	0.000124325
GOMF_ALCOHOL_DEHYDROGENASE_ACTIVITY_ZINC_DEPENDENT	0.644403	0.00012632
GOMF_PHOSPHORIC_DIESTER_HYDROLASE_ACTIVITY	0.64206	0.000139697
GOMF_SNARE_BINDING	0.641196	0.000144963
GOMF_ASPARTIC_TYPE_PEPTIDASE_ACTIVITY	0.640086	0.000152016
GOMF_NEUROPEPTIDE_Y_RECEPTOR_ACTIVITY	0.63947	0.000156077
GOMF_MONOATOMIC_CATION_TRANSMEMBRANE_TRANSPORTER_ACTIVITY	0.638976	0.0001594
GOMF_3_5_CYCLIC_GMP_PHOSPHODIESTERASE_ACTIVITY	0.637496	0.000169783
GOMF_RETINOIC_ACID_BINDING	0.637373	0.000170678
GOMF_MONOATOMIC_ION_TRANSMEMBRANE_TRANSPORTER_ACTIVITY	0.636386	0.000177995
GOMF_NEUROTROPHIN_RECEPTOR_ACTIVITY	0.635646	0.00018368
GOMF_3_CHLOROALLYL_ALDEHYDE_DEHYDROGENASE_ACTIVITY	0.634166	0.000195577
GOMF_OXALATE_TRANSMEMBRANE_TRANSPORTER_ACTIVITY	0.634166	0.000195577
GOMF_UBIQUINONE_BINDING	0.627012	0.000264244
GOMF_MYOSIN_V_BINDING	0.626642	0.000268358
GOMF_LYSOPHOSPHATIDIC_ACID_PHOSPHATASE_ACTIVITY	0.626272	0.000272533
GOMF_DYSTROGLYCAN_BINDING	0.622695	0.000316199
GOMF_STEROID_DEHYDROGENASE_ACTIVITY_ACTING_ON_THE_CH_OH_GROUP_OF_DONORS_NAD_OR_NADP_AS_ACCEPTOR	0.622448	0.000319442
GOMF_NEUREXIN_FAMILY_PROTEIN_BINDING	0.621585	0.000331046
GOMF_MOLYBDOPTERIN_COFACTOR_BINDING	0.620105	0.000351871
GOMF_NUCLEOTIDE_SUGAR_TRANSMEMBRANE_TRANSPORTER_ACTIVITY	0.619118	0.000366435
GOMF_TRANSPORTER_ACTIVITY	0.618378	0.00037773
GOMF_ICOSANOID_RECEPTOR_ACTIVITY	0.615911	0.000417798
GOMF_O_ACYLTRANSFERASE_ACTIVITY	0.612828	0.000473518
GOMF_C_ACYLTRANSFERASE_ACTIVITY	0.608141	0.000571736
GOMF_CHLORIDE_CHANNEL_REGULATOR_ACTIVITY	0.606537	0.000609508
GOMF_PROSTAGLANDIN_E_RECEPTOR_ACTIVITY	0.59889	0.000823961
GOMF_POTASSIUM_ION_LEAK_CHANNEL_ACTIVITY	0.592599	0.00105105
GOMF_STEROID_DEHYDROGENASE_ACTIVITY	0.587912	0.00125665
GOMF_CARBOHYDRATE_PROTON_SYMPORTER_ACTIVITY	0.583349	0.00149211
GOMF_OXIDOREDUCTASE_ACTIVITY_ACTING_ON_PAIRED_DONORS_WITH_INCORPORATION_OR_REDUCTION_OF_MOLECULAR_OXYGEN_ANOTHER_COMPOUND_AS_ONE_DONOR_AND_INCORPORATION_OF_ONE_ATOM_OF_OXYGEN	0.582732	0.00152689
GOMF_PHOSPHOLIPASE_ACTIVITY	0.580882	0.00163577
GOMF_CHANNEL_INHIBITOR_ACTIVITY	0.579648	0.00171229
GOMF_VOLTAGE_GATED_CALCIUM_CHANNEL_ACTIVITY_INVOLVED_IN_CARDIAC_MUSCLE_CELL_ACTION_POTENTIAL	0.578168	0.00180848
GOMF_RNA_POLYMERASE_II_CTD_HEPTAPEPTIDE_REPEAT_PHOSPHATASE_ACTIVITY	0.577922	0.00182499
GOMF_INTRACELLULAR_CHLORIDE_CHANNEL_ACTIVITY	0.577798	0.00183329
GOMF_GLUCURONOSYLTRANSFERASE_ACTIVITY	0.576195	0.0019445
GOMF_SODIUM_CHANNEL_REGULATOR_ACTIVITY	0.575085	0.00202509
GOMF_BMP_RECEPTOR_ACTIVITY	0.574098	0.0020993
GOMF_O_ACETYLTRANSFERASE_ACTIVITY	0.573605	0.00213734
GOMF_PRIMARY_AMINE_OXIDASE_ACTIVITY	0.573358	0.0021566
GOMF_FATTY_ACYL_COA_SYNTHASE_ACTIVITY	0.573111	0.00217602
GOMF_G_PROTEIN_BETA_SUBUNIT_BINDING	0.572741	0.00220544
GOMF_CARBONATE_DEHYDRATASE_ACTIVITY	0.571508	0.0023062
GOMF_CYSTEINE_TYPE_ENDOPEPTIDASE_ACTIVITY_INVOLVED_IN_EXECUTION_PHASE_OF_APOPTOSIS	0.570151	0.00242192
GOMF_PROSTANOID_RECEPTOR_ACTIVITY	0.568548	0.00256556
GOMF_GLYCEROL_TRANSMEMBRANE_TRANSPORTER_ACTIVITY	0.564354	0.00297908
GOMF_PHOSPHOLIPASE_A2_ACTIVITY	0.562874	0.00313907
GOMF_BMP_RECEPTOR_BINDING	0.56127	0.00332128
GOMF_ESTROGEN_16_ALPHA_HYDROXYLASE_ACTIVITY	0.56053	0.0034086
GOMF_UDP_GLYCOSYLTRANSFERASE_ACTIVITY	0.56053	0.0034086
GOMF_GATED_CHANNEL_ACTIVITY	0.559297	0.00355884
GOMF_TRANSMEMBRANE_RECEPTOR_PROTEIN_PHOSPHATASE_ACTIVITY	0.556337	0.00394452
GOMF_ALDEHYDE_DEHYDROGENASE_NAD_P_PLUS_ACTIVITY	0.554117	0.00425852
GOMF_STEROID_BINDING	0.553623	0.00433134
GOMF_POTASSIUM_ION_TRANSMEMBRANE_TRANSPORTER_ACTIVITY	0.553253	0.00438669
GOMF_DINUCLEOTIDE_PHOSPHATASE_ACTIVITY	0.552883	0.0044427
GOMF_POTASSIUM_CHANNEL_INHIBITOR_ACTIVITY	0.55165	0.00463415
GOMF_SODIUM_CHANNEL_ACTIVITY	0.549923	0.00491487
GOMF_N_N_DIMETHYLANILINE_MONOOXYGENASE_ACTIVITY	0.549676	0.00495622
GOMF_PASSIVE_TRANSMEMBRANE_TRANSPORTER_ACTIVITY	0.548813	0.00510347
GOMF_ADENOSINE_RECEPTOR_BINDING	0.548443	0.00516779
GOMF_N_ACYLSPHINGOSINE_AMIDOHYDROLASE_ACTIVITY	0.542152	0.00638102
GOMF_QUATERNARY_AMMONIUM_GROUP_TRANSMEMBRANE_TRANSPORTER_ACTIVITY	0.539562	0.00695218
GOMF_INTRACELLULAR_CGMP_ACTIVATED_CATION_CHANNEL_ACTIVITY	0.538699	0.00715269
GOMF_BETA_GLUCOSIDASE_ACTIVITY	0.535985	0.00781772
GOMF_O_PALMITOYLTRANSFERASE_ACTIVITY	0.533518	0.0084707
GOMF_METALLODIPEPTIDASE_ACTIVITY	0.532902	0.00864152
GOMF_INOSITOL_1_3_4_5_6_PENTAKISPHOSPHATE_KINASE_ACTIVITY	0.532408	0.00878044
GOMF_SECONDARY_ACTIVE_SULFATE_TRANSMEMBRANE_TRANSPORTER_ACTIVITY	0.528338	0.0100065
GOMF_SODIUM_ION_TRANSMEMBRANE_TRANSPORTER_ACTIVITY	0.527598	0.0102455
GOMF_LIGAND_GATED_CHANNEL_ACTIVITY	0.526488	0.0106137
GOMF_POTASSIUM_CHANNEL_REGULATOR_ACTIVITY	0.526118	0.010739
GOMF_TASTE_RECEPTOR_ACTIVITY	0.525994	0.0107811
GOMF_AMINOPHOSPHOLIPID_FLIPPASE_ACTIVITY	0.525748	0.0108658
GOMF_CYCLIC_NUCLEOTIDE_PHOSPHODIESTERASE_ACTIVITY	0.525748	0.0108658
GOMF_GPI_LINKED_EPHRIN_RECEPTOR_ACTIVITY	0.525624	0.0109083
GOMF_HEXOSYLTRANSFERASE_ACTIVITY	0.523158	0.0117916
GOMF_CARBOHYDRATE_MONOATOMIC_CATION_SYMPORTER_ACTIVITY	0.523034	0.0118375
GOMF_VOLTAGE_GATED_POTASSIUM_CHANNEL_ACTIVITY	0.521924	0.0122573
GOMF_LIPID_PHOSPHATASE_ACTIVITY	0.521554	0.0124002
GOMF_GAMMA_CATENIN_BINDING	0.519334	0.0132899
GOMF_STRUCTURAL_CONSTITUENT_OF_MYELIN_SHEATH	0.518717	0.0135471
GOMF_EPOXIDE_HYDROLASE_ACTIVITY	0.516744	0.0144008
GOMF_PALMITOYLTRANSFERASE_ACTIVITY	0.516127	0.0146775
GOMF_ACTIVE_TRANSMEMBRANE_TRANSPORTER_ACTIVITY	0.51551	0.0149589
GOMF_MONOATOMIC_CATION_CHANNEL_ACTIVITY	0.51403	0.0156545
GOMF_GLUCOSIDASE_ACTIVITY	0.513907	0.0157138
GOMF_CALCIUM_DEPENDENT_PHOSPHOLIPID_BINDING	0.51292	0.0161953
GOMF_ACETYLCHOLINE_RECEPTOR_BINDING	0.511933	0.0166902
GOMF_LIGAND_GATED_MONOATOMIC_CATION_CHANNEL_ACTIVITY	0.511933	0.0166902
GOMF_AP_1_ADAPTOR_COMPLEX_BINDING	0.508233	0.0186704
GOMF_HIGH_VOLTAGE_GATED_CALCIUM_CHANNEL_ACTIVITY	0.506753	0.0195203
GOMF_SYMPORTER_ACTIVITY	0.50626	0.0198113
GOMF_CARNITINE_TRANSMEMBRANE_TRANSPORTER_ACTIVITY	0.506013	0.0199583
GOMF_CHLORIDE_ION_BINDING	0.505396	0.0203301
GOMF_POTASSIUM_CHANNEL_ACTIVITY	0.504409	0.0209379
GOMF_ACTIVIN_RECEPTOR_ACTIVITY_TYPE_I	0.502559	0.0221221
GOMF_OUTWARD_RECTIFIER_POTASSIUM_CHANNEL_ACTIVITY	0.502066	0.022448
GOMF_ADRENERGIC_RECEPTOR_ACTIVITY	0.501943	0.0225301
GOMF_COBALAMIN_BINDING	0.501326	0.0229449
GOMF_CATALYTIC_ACTIVITY_ACTING_ON_A_GLYCOPROTEIN	0.500586	0.0234517
GOMF_LIPASE_ACTIVITY	0.499352	0.024319
GOMF_MICROFILAMENT_MOTOR_ACTIVITY	0.498119	0.0252151
GOMF_SEMAPHORIN_RECEPTOR_BINDING	0.497872	0.0253979
GOMF_VOLTAGE_GATED_CHANNEL_ACTIVITY	0.497379	0.025767
GOMF_OXIDOREDUCTASE_ACTIVITY_ACTING_ON_CH_OH_GROUP_OF_DONORS	0.496639	0.0263298
GOMF_ENDOPEPTIDASE_ACTIVITY	0.496516	0.0264247
GOMF_NADPLUS_PROTEIN_ARGININE_ADP_RIBOSYLTRANSFERASE_ACTIVITY	0.496146	0.0267112
GOMF_CHLORIDE_CHANNEL_INHIBITOR_ACTIVITY	0.494542	0.0279852
GOMF_VOLTAGE_GATED_MONOATOMIC_CATION_CHANNEL_ACTIVITY	0.493062	0.0292096
GOMF_NMDA_GLUTAMATE_RECEPTOR_ACTIVITY	0.492322	0.0298397
GOMF_MONOOXYGENASE_ACTIVITY	0.490842	0.0311369
GOMF_CHEMOREPELLENT_ACTIVITY	0.490472	0.0314691
GOMF_STEROID_HYDROXYLASE_ACTIVITY	0.490102	0.0318044
GOMF_SOLUTE_PROTON_SYMPORTER_ACTIVITY	0.489115	0.0327145
GOMF_ESTRADIOL_17_BETA_DEHYDROGENASE_NAD_P_ACTIVITY	0.487142	0.0346053
GOMF_CHITINASE_ACTIVITY	0.486525	0.035216
GOMF_GALACTOSYLTRANSFERASE_ACTIVITY	0.486278	0.035463
GOMF_PHOSPHATIDYLCHOLINE_FLIPPASE_ACTIVITY	0.486155	0.0355871
GOMF_MONOCARBOXYLIC_ACID_TRANSMEMBRANE_TRANSPORTER_ACTIVITY	0.485415	0.0363399
GOMF_GDP_PHOSPHATASE_ACTIVITY	0.485291	0.0364667
GOMF_SOMATOSTATIN_RECEPTOR_ACTIVITY	0.484921	0.0368496
GOMF_ACETYLCHOLINE_BINDING	0.482331	0.0396331
GOMF_ALDO_KETO_REDUCTASE_NADP_ACTIVITY	0.482084	0.0399078
GOMF_PROTEIN_BINDING_INVOLVED_IN_HETEROTYPIC_CELL_CELL_ADHESION	0.481838	0.0401842
GOMF_PHOSPHOLIPASE_BINDING	0.481714	0.0403231
GOMF_CALCIUM_ACTIVATED_CATION_CHANNEL_ACTIVITY	0.481344	0.0407422
GOMF_1_PHOSPHATIDYLINOSITOL_3_KINASE_ACTIVITY	0.480851	0.0413072
GOMF_SOLUTE_INORGANIC_ANION_ANTIPORTER_ACTIVITY	0.480851	0.0413072
GOMF_LIPID_BINDING	0.479248	0.0431924
GOMF_SULFATE_TRANSMEMBRANE_TRANSPORTER_ACTIVITY	0.479248	0.0431924
GOMF_CALCIUM_ION_TRANSMEMBRANE_TRANSPORTER_ACTIVITY	0.479001	0.0434892
GOMF_FAD_BINDING	0.477274	0.0456185
GOMF_MYOSIN_BINDING	0.476904	0.0460868
GOMF_GLYCOSYLTRANSFERASE_ACTIVITY	0.475301	0.0481664
GOMF_POTASSIUM_PROTON_ANTIPORTER_ACTIVITY	0.475177	0.0483298
GOMF_ACETYLGALACTOSAMINYLTRANSFERASE_ACTIVITY	0.474931	0.0486581
GOMF_DNA_DAMAGE_SENSOR_ACTIVITY	-0.474684	0.0489884
GOMF_LYSINE_N_METHYLTRANSFERASE_ACTIVITY	-0.474684	0.0489884
GOMF_DNA_APURINIC_OR_APYRIMIDINIC_SITE_ENDONUCLEASE_ACTIVITY	-0.475177	0.0483298
GOMF_CYTOSKELETAL_MOTOR_ACTIVITY	-0.475424	0.0480035
GOMF_RNA_ENDONUCLEASE_ACTIVITY_PRODUCING_5_PHOSPHOMONOESTERS	-0.475917	0.0473568
GOMF_L_LYSINE_TRANSMEMBRANE_TRANSPORTER_ACTIVITY	-0.476904	0.0460868
GOMF_TRNA_BINDING	-0.480851	0.0413072
GOMF_3_5_DNA_EXONUCLEASE_ACTIVITY	-0.480974	0.0411653
GOMF_ENDONUCLEASE_ACTIVITY_ACTIVE_WITH_EITHER_RIBO_OR_DEOXYRIBONUCLEIC_ACIDS_AND_PRODUCING_5_PHOSPHOMONOESTERS	-0.481098	0.0410239
GOMF_DYNEIN_INTERMEDIATE_CHAIN_BINDING	-0.481468	0.0406021
GOMF_D_LOOP_DNA_BINDING	-0.481961	0.0400458
GOMF_RIBONUCLEASE_P_ACTIVITY	-0.481961	0.0400458
GOMF_S_METHYLTRANSFERASE_ACTIVITY	-0.482578	0.0393601
GOMF_TFIID_CLASS_TRANSCRIPTION_FACTOR_COMPLEX_BINDING	-0.482578	0.0393601
GOMF_ATP_DEPENDENT_DNA_DNA_ANNEALING_ACTIVITY	-0.482825	0.0390888
GOMF_RIBOSOMAL_SMALL_SUBUNIT_BINDING	-0.483071	0.0388191
GOMF_U1_SNRNP_BINDING	-0.483441	0.0384178
GOMF_TELOMERASE_INHIBITOR_ACTIVITY	-0.483688	0.0381524
GOMF_5_3_DNA_EXONUCLEASE_ACTIVITY	-0.486031	0.0357116
GOMF_RNA_POLYMERASE_II_ACTIVITY	-0.488622	0.0331782
GOMF_ANAPHASE_PROMOTING_COMPLEX_BINDING	-0.491212	0.030808
GOMF_NUCLEOTIDYLTRANSFERASE_ACTIVITY	-0.491582	0.0304821
GOMF_ADENYL_NUCLEOTIDE_BINDING	-0.493185	0.0291057
GOMF_BASAL_TRANSCRIPTION_MACHINERY_BINDING	-0.493555	0.0287962
GOMF_VOLTAGE_GATED_MONOATOMIC_ANION_CHANNEL_ACTIVITY	-0.493925	0.0284896
GOMF_SERINE_TRANSMEMBRANE_TRANSPORTER_ACTIVITY	-0.494172	0.0282868
GOMF_DNA_DEMETHYLASE_ACTIVITY	-0.495652	0.0270975
GOMF_TRANSCRIPTION_COREGULATOR_ACTIVITY	-0.495899	0.0269037
GOMF_UBIQUITIN_LIKE_PROTEIN_LIGASE_BINDING	-0.496022	0.0268073
GOMF_SNRNA_BINDING	-0.497626	0.0255819
GOMF_RNA_POLYMERASE_III_TYPE_3_PROMOTER_SEQUENCE_SPECIFIC_DNA_BINDING	-0.498859	0.0246739
GOMF_DESUMOYLASE_ACTIVITY	-0.499229	0.0244073
GOMF_MRNA_3_UTR_BINDING	-0.499352	0.024319
GOMF_DNA_METHYLTRANSFERASE_ACTIVITY	-0.501819	0.0226125
GOMF_NUCLEAR_RECEPTOR_COACTIVATOR_ACTIVITY	-0.502313	0.0222845
GOMF_NUCLEOSOME_BINDING	-0.503793	0.0213261
GOMF_TRANSCRIPTION_REGULATOR_INHIBITOR_ACTIVITY	-0.503916	0.0212479
GOMF_U6_SNRNA_BINDING	-0.503916	0.0212479
GOMF_PHOSPHOSERINE_RESIDUE_BINDING	-0.505396	0.0203301
GOMF_TRANSCRIPTION_REGULATOR_ACTIVATOR_ACTIVITY	-0.50589	0.0200322
GOMF_RNA_POLYMERASE_ACTIVITY	-0.506013	0.0199583
GOMF_DAMAGED_DNA_BINDING	-0.506876	0.0194482
GOMF_PRIMARY_MIRNA_BINDING	-0.507123	0.0193046
GOMF_UBIQUITIN_LIKE_MODIFIER_ACTIVATING_ENZYME_ACTIVITY	-0.508233	0.0186704
GOMF_MAP_KINASE_TYROSINE_SERINE_THREONINE_PHOSPHATASE_ACTIVITY	-0.509097	0.0181902
GOMF_TRNA_GUANINE_METHYLTRANSFERASE_ACTIVITY	-0.509097	0.0181902
GOMF_DNA_BINDING_BENDING	-0.510207	0.0175893
GOMF_DNA_DIRECTED_DNA_POLYMERASE_ACTIVITY	-0.510207	0.0175893
GOMF_GENERAL_TRANSCRIPTION_INITIATION_FACTOR_ACTIVITY	-0.51033	0.0175236
GOMF_BUBBLE_DNA_BINDING	-0.512673	0.0163178
GOMF_STEROL_ESTERASE_ACTIVITY	-0.5144	0.0154779
GOMF_CATALYTIC_ACTIVITY_ACTING_ON_A_RRNA	-0.514524	0.0154195
GOMF_CATALYTIC_ACTIVITY_ACTING_ON_A_TRNA	-0.518841	0.0134953
GOMF_PEROXISOME_PROLIFERATOR_ACTIVATED_RECEPTOR_BINDING	-0.519087	0.0133922
GOMF_DNA_BINDING_TRANSCRIPTION_FACTOR_BINDING	-0.520567	0.0127887
GOMF_HISTONE_H3K4_MONOMETHYLTRANSFERASE_ACTIVITY	-0.520691	0.0127395
GOMF_UBIQUITINATION_LIKE_MODIFICATION_DEPENDENT_PROTEIN_BINDING	-0.522418	0.012069
GOMF_DOUBLE_STRANDED_METHYLATED_DNA_BINDING	-0.523528	0.0116551
GOMF_RNA_POLYMERASE_I_TRANSCRIPTION_REGULATORY_REGION_SEQUENCE_SPECIFIC_DNA_BINDING	-0.523898	0.0115201
GOMF_NUCLEAR_EXPORT_SIGNAL_RECEPTOR_ACTIVITY	-0.526241	0.0106971
GOMF_HISTONE_H3K9_TRIMETHYLTRANSFERASE_ACTIVITY	-0.527105	0.0104076
GOMF_ADENINE_TRANSMEMBRANE_TRANSPORTER_ACTIVITY	-0.528091	0.0100856
GOMF_TRANSLATION_REGULATOR_ACTIVITY	-0.529078	0.00977259
GOMF_PROTEASOME_ACTIVATING_ACTIVITY	-0.529448	0.00965752
GOMF_PROTEIN_CONTAINING_COMPLEX_BINDING	-0.530558	0.00931968
GOMF_MODIFIED_AMINO_ACID_TRANSMEMBRANE_TRANSPORTER_ACTIVITY	-0.530805	0.00924608
GOMF_HISTONE_METHYLTRANSFERASE_ACTIVITY	-0.534628	0.00817094
GOMF_WD40_REPEAT_DOMAIN_BINDING	-0.536232	0.00775501
GOMF_HISTONE_H3_METHYLTRANSFERASE_ACTIVITY	-0.538205	0.00726963
GOMF_RNA_POLYMERASE_III_TRANSCRIPTION_REGULATORY_REGION_SEQUENCE_SPECIFIC_DNA_BINDING	-0.538329	0.00724023
GOMF_RNA_POLYMERASE_II_GENERAL_TRANSCRIPTION_INITIATION_FACTOR_ACTIVITY	-0.538452	0.00721094
GOMF_ADP_BINDING	-0.540796	0.00667462
GOMF_DNA_NUCLEASE_ACTIVITY	-0.541412	0.00653967
GOMF_3_5_EXONUCLEASE_ACTIVITY	-0.542399	0.00632892
GOMF_DOUBLE_STRANDED_RNA_BINDING	-0.542769	0.0062515
GOMF_SMALL_PROTEIN_ACTIVATING_ENZYME_BINDING	-0.543016	0.00620037
GOMF_P53_BINDING	-0.544496	0.00590153
GOMF_LIGASE_ACTIVITY_FORMING_CARBON_OXYGEN_BONDS	-0.546223	0.00556954
GOMF_TRNA_SPECIFIC_ADENOSINE_DEAMINASE_ACTIVITY	-0.546469	0.00552353
GOMF_DOUBLE_STRANDED_DNA_EXODEOXYRIBONUCLEASE_ACTIVITY	-0.547579	0.00532076
GOMF_HYDROLASE_ACTIVITY_ACTING_ON_CARBON_NITROGEN_BUT_NOT_PEPTIDE_BONDS_IN_CYCLIC_AMIDES	-0.548936	0.00508219
GOMF_NUCLEAR_THYROID_HORMONE_RECEPTOR_BINDING	-0.548936	0.00508219
GOMF_U3_SNORNA_BINDING	-0.54906	0.005061
GOMF_CYCLIN_DEPENDENT_PROTEIN_SERINE_THREONINE_KINASE_ACTIVATOR_ACTIVITY	-0.549676	0.00495622
GOMF_PLUS_END_DIRECTED_MICROTUBULE_MOTOR_ACTIVITY	-0.550416	0.00483312
GOMF_LIM_DOMAIN_BINDING	-0.55128	0.00469304
GOMF_PROTEIN_METHYLTRANSFERASE_ACTIVITY	-0.55461	0.00418683
GOMF_SMALL_MOLECULE_SENSOR_ACTIVITY	-0.55535	0.00408136
GOMF_CATALYTIC_ACTIVITY_ACTING_ON_RNA	-0.55572	0.00402954
GOMF_S_ADENOSYLMETHIONINE_DEPENDENT_METHYLTRANSFERASE_ACTIVITY	-0.556707	0.0038943
GOMF_AMINO_ACID_TRANSMEMBRANE_TRANSPORTER_ACTIVITY	-0.55683	0.00387769
GOMF_RIBOSOME_BINDING	-0.557817	0.00374713
GOMF_GAMMA_TUBULIN_BINDING	-0.558804	0.00362062
GOMF_RNA_METHYLTRANSFERASE_ACTIVITY	-0.558804	0.00362062
GOMF_TRANSLATION_REGULATOR_ACTIVITY_NUCLEIC_ACID_BINDING	-0.55979	0.00349803
GOMF_TRANSLATION_TERMINATION_FACTOR_ACTIVITY	-0.56053	0.0034086
GOMF_GENERAL_TRANSCRIPTION_INITIATION_FACTOR_BINDING	-0.560777	0.00337926
GOMF_METHYL_CPG_BINDING	-0.561147	0.00333569
GOMF_MICROTUBULE_MOTOR_ACTIVITY	-0.565094	0.00290192
GOMF_UBIQUITIN_BINDING	-0.566574	0.00275309
GOMF_RNA_POLYMERASE_III_ACTIVITY	-0.567191	0.00269318
GOMF_EXONUCLEASE_ACTIVITY	-0.568054	0.00261131
GOMF_POLY_A_BINDING	-0.568424	0.00257693
GOMF_RNA_DNA_HYBRID_RIBONUCLEASE_ACTIVITY	-0.568548	0.00256556
GOMF_TRANSLATION_FACTOR_ACTIVITY_RNA_BINDING	-0.568918	0.00253173
GOMF_MICROTUBULE_MINUS_END_BINDING	-0.569041	0.00252055
GOMF_RNA_EXONUCLEASE_ACTIVITY_PRODUCING_5_PHOSPHOMONOESTERS	-0.569781	0.0024544
GOMF_POLY_PYRIMIDINE_TRACT_BINDING	-0.570028	0.0024327
GOMF_N6_METHYLADENOSINE_CONTAINING_RNA_BINDING	-0.573851	0.00211825
GOMF_RNA_EXONUCLEASE_ACTIVITY	-0.575208	0.00201599
GOMF_MICROTUBULE_BINDING	-0.575455	0.00199789
GOMF_SINGLE_STRANDED_DNA_HELICASE_ACTIVITY	-0.576195	0.0019445
GOMF_HISTONE_H3K4_METHYLTRANSFERASE_ACTIVITY	-0.576442	0.00192699
GOMF_EUKARYOTIC_INITIATION_FACTOR_4E_BINDING	-0.577058	0.00188387
GOMF_CARBON_NITROGEN_LIGASE_ACTIVITY_WITH_GLUTAMINE_AS_AMIDO_N_DONOR	-0.578415	0.00179211
GOMF_CHROMO_SHADOW_DOMAIN_BINDING	-0.580635	0.00165081
GOMF_FOUR_WAY_JUNCTION_HELICASE_ACTIVITY	-0.582362	0.00154811
GOMF_BETA_TUBULIN_BINDING	-0.583225	0.00149901
GOMF_L_AMINO_ACID_TRANSMEMBRANE_TRANSPORTER_ACTIVITY	-0.583842	0.00146482
GOMF_RNA_POLYMERASE_II_GENERAL_TRANSCRIPTION_INITIATION_FACTOR_BINDING	-0.584706	0.00141816
GOMF_PROTEIN_FOLDING_CHAPERONE	-0.587789	0.00126253
GOMF_TRANSFERASE_ACTIVITY_TRANSFERRING_ONE_CARBON_GROUPS	-0.588159	0.00124496
GOMF_UNFOLDED_PROTEIN_BINDING	-0.588282	0.00123915
GOMF_MRNA_BINDING	-0.589639	0.00117691
GOMF_KINETOCHORE_BINDING	-0.591613	0.00109154
GOMF_G_QUADRUPLEX_DNA_BINDING	-0.591983	0.00107619
GOMF_HISTONE_MODIFYING_ACTIVITY	-0.592229	0.00106607
GOMF_CATALYTIC_ACTIVITY_ACTING_ON_A_NUCLEIC_ACID	-0.592723	0.00104608
GOMF_RNA_POLYMERASE_III_GENERAL_TRANSCRIPTION_INITIATION_FACTOR_ACTIVITY	-0.592723	0.00104608
GOMF_EXONUCLEASE_ACTIVITY_ACTIVE_WITH_EITHER_RIBO_OR_DEOXYRIBONUCLEIC_ACIDS_AND_PRODUCING_5_PHOSPHOMONOESTERS	-0.594203	0.000988202
GOMF_CORE_PROMOTER_SEQUENCE_SPECIFIC_DNA_BINDING	-0.594573	0.000974204
GOMF_UBIQUITIN_LIKE_PROTEIN_CONJUGATING_ENZYME_ACTIVITY	-0.595683	0.000933309
GOMF_TRANSCRIPTION_FACTOR_BINDING	-0.596053	0.000920036
GOMF_SNORNA_BINDING	-0.596176	0.000915651
GOMF_DNA_CLAMP_LOADER_ACTIVITY	-0.596916	0.000889746
GOMF_5_3_EXONUCLEASE_ACTIVITY	-0.597533	0.000868681
GOMF_UBIQUITIN_PROTEIN_TRANSFERASE_REGULATOR_ACTIVITY	-0.59889	0.000823961
GOMF_TRNA_METHYLTRANSFERASE_ACTIVITY	-0.60074	0.000766429
GOMF_DYNACTIN_BINDING	-0.60148	0.000744483
GOMF_5_DEOXYRIBOSE_5_PHOSPHATE_LYASE_ACTIVITY	-0.601603	0.000740882
GOMF_BASIC_AMINO_ACID_TRANSMEMBRANE_TRANSPORTER_ACTIVITY	-0.602714	0.000709204
GOMF_DNA_EXONUCLEASE_ACTIVITY	-0.60333	0.000692156
GOMF_DNA_TOPOISOMERASE_ACTIVITY	-0.60444	0.000662429
GOMF_5_3_DNA_HELICASE_ACTIVITY	-0.605057	0.000646434
GOMF_UNMETHYLATED_CPG_BINDING	-0.605797	0.000627717
GOMF_HISTONE_H3K27_METHYLTRANSFERASE_ACTIVITY	-0.606907	0.000600589
GOMF_PROTEIN_PHOSPHATASE_2A_BINDING	-0.610114	0.000528257
GOMF_3_5_DNA_HELICASE_ACTIVITY	-0.612458	0.000480655
GOMF_TRANSLATION_INITIATION_FACTOR_ACTIVITY	-0.617145	0.000397288
GOMF_RIBONUCLEOPROTEIN_COMPLEX_BINDING	-0.617885	0.000385442
GOMF_ATP_DEPENDENT_CHROMATIN_REMODELER_ACTIVITY	-0.621338	0.000334434
GOMF_HISTONE_METHYLTRANSFERASE_BINDING	-0.621832	0.000327691
GOMF_SUMO_BINDING	-0.621955	0.000326025
GOMF_SNRNP_BINDING	-0.622202	0.000322718
GOMF_SIGNAL_SEQUENCE_BINDING	-0.622572	0.000317817
GOMF_FOUR_WAY_JUNCTION_DNA_BINDING	-0.622818	0.000314588
GOMF_DNA_POLYMERASE_BINDING	-0.625162	0.000285431
GOMF_UBIQUITIN_LIKE_PROTEIN_PEPTIDASE_ACTIVITY	-0.629849	0.000234637
GOMF_MOLECULAR_CARRIER_ACTIVITY	-0.629972	0.000233424
GOMF_STRUCTURAL_CONSTITUENT_OF_NUCLEAR_PORE	-0.630589	0.00022745
GOMF_ATP_DEPENDENT_PROTEIN_BINDING	-0.631946	0.000214816
GOMF_SINGLE_STRANDED_DNA_BINDING	-0.634906	0.000189539
GOMF_ATP_DEPENDENT_PROTEIN_FOLDING_CHAPERONE	-0.636016	0.000180816
GOMF_TELOMERASE_RNA_BINDING	-0.638236	0.000164513
GOMF_DNA_SECONDARY_STRUCTURE_BINDING	-0.638853	0.000160241
GOMF_L_GLUTAMINE_TRANSMEMBRANE_TRANSPORTER_ACTIVITY	-0.641443	0.00014344
GOMF_PROTEIN_FOLDING_CHAPERONE_BINDING	-0.641566	0.000142684
GOMF_LYSINE_ACETYLATED_HISTONE_BINDING	-0.6428	0.000135331
GOMF_SINGLE_STRANDED_RNA_BINDING	-0.643047	0.000133906
GOMF_RDNA_BINDING	-0.644897	0.000123667
GOMF_CATALYTIC_ACTIVITY_ACTING_ON_DNA	-0.6465	0.000115411
GOMF_K63_LINKED_DEUBIQUITINASE_ACTIVITY	-0.647734	0.000109428
GOMF_O_METHYLTRANSFERASE_ACTIVITY	-0.648844	0.000104303
GOMF_RNA_POLYMERASE_I_ACTIVITY	-0.649214	0.000102647
GOMF_U4_SNRNA_BINDING	-0.64946	0.000101558
GOMF_DNA_REPLICATION_ORIGIN_BINDING	-0.650077	9.8883e-05
GOMF_L_LEUCINE_TRANSMEMBRANE_TRANSPORTER_ACTIVITY	-0.652297	8.9813e-05
GOMF_AROMATIC_AMINO_ACID_TRANSMEMBRANE_TRANSPORTER_ACTIVITY	-0.652667	8.83828e-05
GOMF_DNA_HELICASE_ACTIVITY	-0.654147	8.28825e-05
GOMF_NF_KAPPAB_BINDING	-0.656861	7.36603e-05
GOMF_ATP_DEPENDENT_ACTIVITY_ACTING_ON_RNA	-0.657601	7.13261e-05
GOMF_HSP70_PROTEIN_BINDING	-0.658711	6.79614e-05
GOMF_DNA_DNA_ANNEALING_ACTIVITY	-0.661918	5.9101e-05
GOMF_NUCLEOCYTOPLASMIC_CARRIER_ACTIVITY	-0.664015	5.39398e-05
GOMF_TUBULIN_BINDING	-0.666605	4.81823e-05
GOMF_RNA_2_O_METHYLTRANSFERASE_ACTIVITY	-0.670305	4.10114e-05
GOMF_TRNA_CYTOSINE_METHYLTRANSFERASE_ACTIVITY	-0.671415	3.90777e-05
GOMF_ATP_DEPENDENT_ACTIVITY_ACTING_ON_DNA	-0.674499	3.41769e-05
GOMF_U1_SNRNA_BINDING	-0.679063	2.80447e-05
GOMF_ANNEALING_ACTIVITY	-0.68227	2.44188e-05
GOMF_TELOMERIC_DNA_BINDING	-0.68227	2.44188e-05
GOMF_FOLIC_ACID_TRANSMEMBRANE_TRANSPORTER_ACTIVITY	-0.682886	2.37786e-05
GOMF_HYDROLASE_ACTIVITY_ACTING_ON_ACID_ANHYDRIDES	-0.688683	1.85414e-05
GOMF_UBIQUITIN_LIKE_PROTEIN_BINDING	-0.690903	1.68644e-05
GOMF_METHYLATION_DEPENDENT_PROTEIN_BINDING	-0.693	1.54238e-05
GOMF_OXIDATIVE_RNA_DEMETHYLASE_ACTIVITY	-0.69411	1.47131e-05
GOMF_ATP_DEPENDENT_ACTIVITY	-0.694727	1.43328e-05
GOMF_DNA_TRANSLOCASE_ACTIVITY	-0.694974	1.41836e-05
GOMF_HELICASE_ACTIVITY	-0.697194	1.291e-05
GOMF_NUCLEAR_IMPORT_SIGNAL_RECEPTOR_ACTIVITY	-0.699291	1.18146e-05
GOMF_HISTONE_BINDING	-0.703731	9.7967e-06
GOMF_ATP_HYDROLYSIS_ACTIVITY	-0.703854	9.74592e-06
GOMF_RNA_STEM_LOOP_BINDING	-0.704348	9.54545e-06
GOMF_MRNA_5_UTR_BINDING	-0.706198	8.82984e-06
GOMF_PROMOTER_SPECIFIC_CHROMATIN_BINDING	-0.706815	8.60343e-06
GOMF_TRANSLATION_INITIATION_FACTOR_BINDING	-0.706938	8.55884e-06
GOMF_RNA_POLYMERASE_II_CTD_HEPTAPEPTIDE_REPEAT_KINASE_ACTIVITY	-0.711378	7.09716e-06
GOMF_MODIFICATION_DEPENDENT_PROTEIN_BINDING	-0.718902	5.15195e-06
GOMF_DEUBIQUITINASE_ACTIVITY	-0.720999	4.70571e-06
GOMF_NUCLEAR_LOCALIZATION_SEQUENCE_BINDING	-0.725439	3.87192e-06
GOMF_CHROMATIN_BINDING	-0.730866	3.02493e-06
GOMF_POLY_PURINE_TRACT_BINDING	-0.73543	2.43147e-06
GOMF_PROTEASOME_BINDING	-0.751588	9.46681e-07
GOMF_POLY_G_BINDING	-0.761209	3.76522e-07
GOMF_HSP90_PROTEIN_BINDING	-0.767746	8.14369e-08
GOMF_HEAT_SHOCK_PROTEIN_BINDING	-0.809682	0

## Sheet: BP
H.pathways	rho	q.value
GOBP_EPITHELIAL_STRUCTURE_MAINTENANCE	0.830281	0
GOBP_MAINTENANCE_OF_GASTROINTESTINAL_EPITHELIUM	0.799815	0
GOBP_CONSTITUTIVE_SECRETORY_PATHWAY	0.790071	0
GOBP_LOBAR_BRONCHUS_EPITHELIUM_DEVELOPMENT	0.774283	0
GOBP_FLAVONOID_METABOLIC_PROCESS	0.761825	3.45816e-07
GOBP_LOBAR_BRONCHUS_DEVELOPMENT	0.755165	7.13257e-07
GOBP_EPOXIDE_METABOLIC_PROCESS	0.748628	1.16188e-06
GOBP_CHOLINE_TRANSPORT	0.744928	1.4625e-06
GOBP_MUCUS_SECRETION	0.743941	1.54916e-06
GOBP_ESTROGEN_METABOLIC_PROCESS	0.741967	1.73142e-06
GOBP_POSITIVE_REGULATION_OF_SODIUM_ION_TRANSMEMBRANE_TRANSPORTER_ACTIVITY	0.740364	1.88879e-06
GOBP_PRIMARY_ALCOHOL_METABOLIC_PROCESS	0.738514	2.08147e-06
GOBP_POSITIVE_REGULATION_OF_SODIUM_ION_TRANSMEMBRANE_TRANSPORT	0.736787	2.27281e-06
GOBP_CALCIUM_ION_REGULATED_EXOCYTOSIS_OF_NEUROTRANSMITTER	0.73617	2.34399e-06
GOBP_SECRETION_BY_TISSUE	0.731977	2.87151e-06
GOBP_DIGESTION	0.73136	2.95598e-06
GOBP_PHOSPHOLIPASE_C_ACTIVATING_DOPAMINE_RECEPTOR_SIGNALING_PATHWAY	0.73136	2.95598e-06
GOBP_AV_NODE_CELL_TO_BUNDLE_OF_HIS_CELL_SIGNALING	0.73099	3.00758e-06
GOBP_RETINOL_METABOLIC_PROCESS	0.72951	3.22106e-06
GOBP_RETINOIC_ACID_METABOLIC_PROCESS	0.728646	3.35104e-06
GOBP_CELLULAR_GLUCURONIDATION	0.724083	4.11188e-06
GOBP_REGULATION_OF_RELAXATION_OF_CARDIAC_MUSCLE	0.723836	4.15685e-06
GOBP_URONIC_ACID_METABOLIC_PROCESS	0.718656	5.2069e-06
GOBP_TERPENOID_METABOLIC_PROCESS	0.717422	5.4898e-06
GOBP_UREA_TRANSMEMBRANE_TRANSPORT	0.716435	5.7263e-06
GOBP_PROSTATE_GLANDULAR_ACINUS_MORPHOGENESIS	0.716065	5.8174e-06
GOBP_GOLGI_RIBBON_FORMATION	0.715942	5.84807e-06
GOBP_NEGATIVE_REGULATION_OF_PEPTIDE_SECRETION	0.714462	6.2282e-06
GOBP_PANCREATIC_A_CELL_DIFFERENTIATION	0.714339	6.26091e-06
GOBP_LUNG_SECRETORY_CELL_DIFFERENTIATION	0.712488	6.7717e-06
GOBP_NEURONAL_DENSE_CORE_VESICLE_EXOCYTOSIS	0.712488	6.7717e-06
GOBP_REGULATION_OF_RELAXATION_OF_MUSCLE	0.711625	7.02355e-06
GOBP_PLASMA_MEMBRANE_REPAIR	0.705951	8.92206e-06
GOBP_XENOBIOTIC_GLUCURONIDATION	0.705705	9.01524e-06
GOBP_BRANCHING_INVOLVED_IN_PROSTATE_GLAND_MORPHOGENESIS	0.704718	9.39782e-06
GOBP_SODIUM_ION_EXPORT_ACROSS_PLASMA_MEMBRANE	0.703484	9.89905e-06
GOBP_CELLULAR_RESPONSE_TO_GLUCAGON_STIMULUS	0.702868	1.01597e-05
GOBP_ETHANOL_METABOLIC_PROCESS	0.700154	1.13916e-05
GOBP_DIGESTIVE_SYSTEM_PROCESS	0.699044	1.19384e-05
GOBP_DENSE_CORE_GRANULE_EXOCYTOSIS	0.698797	1.20635e-05
GOBP_HOST_MEDIATED_REGULATION_OF_INTESTINAL_MICROBIOTA_COMPOSITION	0.698427	1.22537e-05
GOBP_OLIGOSACCHARIDE_BIOSYNTHETIC_PROCESS	0.695961	1.36023e-05
GOBP_ANTIBACTERIAL_HUMORAL_RESPONSE	0.695467	1.38898e-05
GOBP_NUCLEOTIDE_SUGAR_METABOLIC_PROCESS	0.69115	1.6688e-05
GOBP_MEMBRANE_DEPOLARIZATION_DURING_AV_NODE_CELL_ACTION_POTENTIAL	0.6893	1.8059e-05
GOBP_EXPORT_ACROSS_PLASMA_MEMBRANE	0.687327	1.96498e-05
GOBP_NUCLEOTIDE_SUGAR_BIOSYNTHETIC_PROCESS	0.686833	2.00696e-05
GOBP_PHOSPHATIDYLCHOLINE_BIOSYNTHETIC_PROCESS	0.686586	2.0283e-05
GOBP_POLYOL_BIOSYNTHETIC_PROCESS	0.685476	2.12724e-05
GOBP_GLYCOLIPID_BIOSYNTHETIC_PROCESS	0.68486	2.18433e-05
GOBP_FLAVONOID_GLUCURONIDATION	0.684736	2.19594e-05
GOBP_REGULATION_OF_PLASMA_MEMBRANE_REPAIR	0.683256	2.34028e-05
GOBP_CELLULAR_RESPONSE_TO_ACIDIC_PH	0.680789	2.60285e-05
GOBP_O_GLYCAN_PROCESSING	0.680789	2.60285e-05
GOBP_SPHINGOID_METABOLIC_PROCESS	0.680419	2.64477e-05
GOBP_SHORT_CHAIN_FATTY_ACID_CATABOLIC_PROCESS	0.679433	2.75996e-05
GOBP_RESPONSE_TO_COLD	0.676842	3.08737e-05
GOBP_CALCIUM_ION_REGULATED_EXOCYTOSIS	0.675362	3.292e-05
GOBP_REGULATION_OF_MICROVILLUS_ASSEMBLY	0.673759	3.52931e-05
GOBP_REGULATION_OF_CAMP_MEDIATED_SIGNALING	0.673512	3.56733e-05
GOBP_REGULATION_OF_CAVEOLIN_MEDIATED_ENDOCYTOSIS	0.670305	4.10114e-05
GOBP_AMYLOID_PRECURSOR_PROTEIN_BIOSYNTHETIC_PROCESS	0.667838	4.56616e-05
GOBP_INSULIN_PROCESSING	0.667098	4.71577e-05
GOBP_MEMBRANE_LIPID_BIOSYNTHETIC_PROCESS	0.666852	4.76672e-05
GOBP_DIOL_METABOLIC_PROCESS	0.666605	4.81823e-05
GOBP_REGULATION_OF_SODIUM_ION_TRANSMEMBRANE_TRANSPORT	0.666482	4.8442e-05
GOBP_LIPOSACCHARIDE_METABOLIC_PROCESS	0.665742	5.00296e-05
GOBP_REGULATION_OF_SODIUM_ION_TRANSMEMBRANE_TRANSPORTER_ACTIVITY	0.665742	5.00296e-05
GOBP_POSITIVE_REGULATION_OF_SODIUM_ION_TRANSPORT	0.665618	5.02992e-05
GOBP_RELAXATION_OF_CARDIAC_MUSCLE	0.662658	5.72254e-05
GOBP_SERTOLI_CELL_PROLIFERATION	0.662165	5.84691e-05
GOBP_CELLULAR_RESPONSE_TO_OXIDISED_LOW_DENSITY_LIPOPROTEIN_PARTICLE_STIMULUS	0.660191	6.37189e-05
GOBP_NEGATIVE_REGULATION_OF_LEUKOCYTE_ADHESION_TO_VASCULAR_ENDOTHELIAL_CELL	0.659821	6.47542e-05
GOBP_OLIGOSACCHARIDE_METABOLIC_PROCESS	0.659081	6.68752e-05
GOBP_LEUKOCYTE_ADHESION_TO_ARTERIAL_ENDOTHELIAL_CELL	0.658341	6.90651e-05
GOBP_REGULATION_OF_SERINE_TYPE_PEPTIDASE_ACTIVITY	0.656861	7.36603e-05
GOBP_ESTROGEN_BIOSYNTHETIC_PROCESS	0.654024	8.33277e-05
GOBP_RESPONSE_TO_MUSCLE_INACTIVITY	0.653037	8.6975e-05
GOBP_DETECTION_OF_VIRUS	0.652051	9.0779e-05
GOBP_FLAVONE_METABOLIC_PROCESS	0.652051	9.0779e-05
GOBP_MEMBRANE_LIPID_METABOLIC_PROCESS	0.652051	9.0779e-05
GOBP_POSITIVE_REGULATION_OF_STORE_OPERATED_CALCIUM_CHANNEL_ACTIVITY	0.651434	9.32389e-05
GOBP_XENOBIOTIC_METABOLIC_PROCESS	0.650324	9.78325e-05
GOBP_REGULATION_OF_HEART_RATE_BY_CARDIAC_CONDUCTION	0.6502	9.83564e-05
GOBP_ISOPRENOID_CATABOLIC_PROCESS	0.649337	0.000102101
GOBP_RESPONSE_TO_NEMATODE	0.649214	0.000102647
GOBP_UREA_TRANSPORT	0.649214	0.000102647
GOBP_POLYOL_METABOLIC_PROCESS	0.648967	0.000103748
GOBP_REGULATION_OF_MICROVILLUS_ORGANIZATION	0.648597	0.000105421
GOBP_PRIMARY_ALCOHOL_CATABOLIC_PROCESS	0.647117	0.000112381
GOBP_NECROPTOTIC_SIGNALING_PATHWAY	0.646007	0.000117893
GOBP_MICTURITION	0.64391	0.000129029
GOBP_REGULATION_OF_PLASMA_MEMBRANE_ORGANIZATION	0.64354	0.000131098
GOBP_NEGATIVE_REGULATION_OF_SERINE_TYPE_PEPTIDASE_ACTIVITY	0.643417	0.000131794
GOBP_RESPONSE_TO_ACIDIC_PH	0.641196	0.000144963
GOBP_UDP_N_ACETYLGLUCOSAMINE_METABOLIC_PROCESS	0.640826	0.000147279
GOBP_REGULATION_OF_GLYCOPROTEIN_METABOLIC_PROCESS	0.640703	0.000148058
GOBP_MECHANORECEPTOR_DIFFERENTIATION	0.640333	0.000150421
GOBP_OLEFINIC_COMPOUND_METABOLIC_PROCESS	0.639223	0.00015773
GOBP_POSITIVE_REGULATION_OF_BLOOD_PRESSURE	0.63836	0.00016365
GOBP_ETHANOL_CATABOLIC_PROCESS	0.63799	0.000166252
GOBP_REGULATION_OF_INSULIN_SECRETION	0.637743	0.000168009
GOBP_SENSORY_PERCEPTION_OF_SOUR_TASTE	0.637249	0.000171576
GOBP_REGULATION_OF_RESTING_MEMBRANE_POTENTIAL	0.637126	0.000172479
GOBP_RELAXATION_OF_MUSCLE	0.636139	0.000179871
GOBP_CELLULAR_RESPONSE_TO_CORTICOSTEROID_STIMULUS	0.635646	0.00018368
GOBP_HORMONE_METABOLIC_PROCESS	0.635276	0.000186587
GOBP_VACUOLE_FUSION	0.632809	0.000207128
GOBP_MULTIVESICULAR_BODY_SORTING_PATHWAY	0.632439	0.00021039
GOBP_INNER_EAR_RECEPTOR_CELL_DEVELOPMENT	0.631329	0.000220473
GOBP_LYSOSOMAL_MEMBRANE_ORGANIZATION	0.631329	0.000220473
GOBP_MAINTENANCE_OF_SYNAPSE_STRUCTURE	0.631329	0.000220473
GOBP_NEGATIVE_REGULATION_OF_EPITHELIAL_TO_MESENCHYMAL_TRANSITION	0.630466	0.000228633
GOBP_ALCOHOL_METABOLIC_PROCESS	0.630219	0.000231017
GOBP_INSULIN_SECRETION	0.629726	0.000235856
GOBP_LIPID_MODIFICATION	0.628986	0.000243295
GOBP_LIPID_CATABOLIC_PROCESS	0.628739	0.000245825
GOBP_POSITIVE_REGULATION_OF_AMYLOID_FIBRIL_FORMATION	0.628739	0.000245825
GOBP_POSITIVE_REGULATION_OF_BLOOD_PRESSURE_BY_EPINEPHRINE_NOREPINEPHRINE	0.628245	0.000250959
GOBP_CHLORIDE_TRANSPORT	0.627875	0.000254876
GOBP_REGULATION_OF_CALCIUM_ION_DEPENDENT_EXOCYTOSIS	0.627012	0.000264244
GOBP_REGULATION_OF_CELL_COMMUNICATION_BY_ELECTRICAL_COUPLING_INVOLVED_IN_CARDIAC_CONDUCTION	0.626025	0.00027535
GOBP_REGULATION_OF_INNER_EAR_AUDITORY_RECEPTOR_CELL_DIFFERENTIATION	0.625779	0.000278195
GOBP_POSITIVE_REGULATION_OF_LONG_TERM_SYNAPTIC_POTENTIATION	0.625285	0.00028397
GOBP_LIPID_GLYCOSYLATION	0.624298	0.000295862
GOBP_REGULATION_OF_HORMONE_LEVELS	0.624298	0.000295862
GOBP_SPHINGOSINE_BIOSYNTHETIC_PROCESS	0.623312	0.000308225
GOBP_NON_LYTIC_VIRAL_RELEASE	0.621955	0.000326025
GOBP_POSITIVE_REGULATION_OF_HEART_RATE_BY_EPINEPHRINE_NOREPINEPHRINE	0.620598	0.000344795
GOBP_PHOSPHATIDIC_ACID_METABOLIC_PROCESS	0.620475	0.000346552
GOBP_REGULATION_OF_CALCIUM_ION_TRANSMEMBRANE_TRANSPORTER_ACTIVITY	0.620475	0.000346552
GOBP_PLATELET_ACTIVATING_FACTOR_METABOLIC_PROCESS	0.619858	0.00035546
GOBP_SPINAL_CORD_OLIGODENDROCYTE_CELL_DIFFERENTIATION	0.619858	0.00035546
GOBP_CELLULAR_LIPID_METABOLIC_PROCESS	0.618501	0.000375825
GOBP_3_PHOSPHOADENOSINE_5_PHOSPHOSULFATE_METABOLIC_PROCESS	0.618378	0.00037773
GOBP_LATE_ENDOSOME_TO_LYSOSOME_TRANSPORT	0.617391	0.000393302
GOBP_CARBOHYDRATE_TRANSPORT	0.616281	0.000411542
GOBP_CELLULAR_RESPONSE_TO_ALDEHYDE	0.615171	0.000430578
GOBP_PROSTATE_GLANDULAR_ACINUS_DEVELOPMENT	0.614801	0.000437105
GOBP_CORTISOL_METABOLIC_PROCESS	0.614308	0.000445953
GOBP_REGULATION_OF_PEPTIDE_TRANSPORT	0.613814	0.000454969
GOBP_LIPID_METABOLIC_PROCESS	0.613198	0.00046648
GOBP_BEHAVIORAL_RESPONSE_TO_PAIN	0.612581	0.000478265
GOBP_PHOSPHATIDYLGLYCEROL_ACYL_CHAIN_REMODELING	0.612334	0.000483057
GOBP_REGULATION_OF_SYSTEMIC_ARTERIAL_BLOOD_PRESSURE_BY_NOREPINEPHRINE_EPINEPHRINE	0.612334	0.000483057
GOBP_NEGATIVE_REGULATION_OF_LYMPHOCYTE_MIGRATION	0.611964	0.000490329
GOBP_POLYOL_TRANSMEMBRANE_TRANSPORT	0.611964	0.000490329
GOBP_COBALT_ION_TRANSPORT	0.611471	0.000500185
GOBP_PROTEIN_RETENTION_IN_ER_LUMEN	0.610854	0.000512767
GOBP_ESCRT_COMPLEX_DISASSEMBLY	0.610361	0.000523045
GOBP_INTESTINAL_EPITHELIAL_CELL_DIFFERENTIATION	0.610361	0.000523045
GOBP_GLYCOSYLCERAMIDE_METABOLIC_PROCESS	0.610237	0.000525645
GOBP_NEUROBLAST_MIGRATION	0.610237	0.000525645
GOBP_POSITIVE_REGULATION_OF_GLYCOPROTEIN_METABOLIC_PROCESS	0.609991	0.000530881
GOBP_LIPID_OXIDATION	0.608511	0.000563337
GOBP_TYPE_III_INTERFERON_PRODUCTION	0.607647	0.000583118
GOBP_RESPONSE_TO_INACTIVITY	0.607524	0.000585997
GOBP_POSITIVE_REGULATION_OF_EXOCYTOSIS	0.60629	0.000615522
GOBP_POSITIVE_REGULATION_OF_SECRETION	0.60555	0.000633899
GOBP_ACTIN_FILAMENT_BASED_TRANSPORT	0.605057	0.000646434
GOBP_DETECTION_OF_LIGHT_STIMULUS	0.604934	0.000649604
GOBP_SODIUM_ION_TRANSMEMBRANE_TRANSPORT	0.60481	0.000652788
GOBP_LIPOPROTEIN_LOCALIZATION	0.604194	0.00066893
GOBP_CELLULAR_RESPONSE_TO_PH	0.601603	0.000740882
GOBP_VESTIBULOCOCHLEAR_NERVE_FORMATION	0.601357	0.000748099
GOBP_POTASSIUM_ION_TRANSPORT	0.600617	0.000770145
GOBP_DIACYLGLYCEROL_BIOSYNTHETIC_PROCESS	0.600247	0.000781393
GOBP_SHORT_CHAIN_FATTY_ACID_METABOLIC_PROCESS	0.600123	0.000785176
GOBP_ACETATE_ESTER_METABOLIC_PROCESS	0.598767	0.000827936
GOBP_LONG_CHAIN_FATTY_ACID_TRANSPORT	0.598643	0.000831929
GOBP_DETOXIFICATION_OF_INORGANIC_COMPOUND	0.598027	0.000852164
GOBP_AMYLOID_PRECURSOR_PROTEIN_METABOLIC_PROCESS	0.597903	0.000856265
GOBP_REGULATION_OF_INTERLEUKIN_6_MEDIATED_SIGNALING_PATHWAY	0.59704	0.000885495
GOBP_VENTRICULAR_CARDIAC_MUSCLE_CELL_ACTION_POTENTIAL	0.59667	0.000898304
GOBP_SODIUM_ION_IMPORT_ACROSS_PLASMA_MEMBRANE	0.595436	0.000942257
GOBP_ENDOSOME_TO_LYSOSOME_TRANSPORT_VIA_MULTIVESICULAR_BODY_SORTING_PATHWAY	0.595313	0.00094676
GOBP_POSITIVE_REGULATION_OF_DOPAMINE_SECRETION	0.594943	0.000960391
GOBP_RESPONSE_TO_PAIN	0.59371	0.00100716
GOBP_CATECHOL_CONTAINING_COMPOUND_CATABOLIC_PROCESS	0.593586	0.00101195
GOBP_REGULATION_OF_SODIUM_ION_TRANSPORT	0.593586	0.00101195
GOBP_NEGATIVE_REGULATION_OF_ACTIN_FILAMENT_DEPOLYMERIZATION	0.592846	0.00104114
GOBP_NEGATIVE_REGULATION_OF_NERVOUS_SYSTEM_PROCESS	0.592846	0.00104114
GOBP_NEGATIVE_REGULATION_OF_CYTOSOLIC_CALCIUM_ION_CONCENTRATION	0.592476	0.00105603
GOBP_REGULATION_OF_EXOCYTOSIS	0.591489	0.0010967
GOBP_MONOATOMIC_CATION_TRANSMEMBRANE_TRANSPORT	0.591366	0.00110189
GOBP_MEDIUM_CHAIN_FATTY_ACID_CATABOLIC_PROCESS	0.591119	0.00111233
GOBP_REGULATION_OF_INTRACELLULAR_LIPID_TRANSPORT	0.590996	0.00111758
GOBP_POSITIVE_REGULATION_OF_ACTION_POTENTIAL	0.590503	0.00113883
GOBP_REGULATION_OF_PROTEIN_GLYCOSYLATION	0.590379	0.0011442
GOBP_RESPONSE_TO_PH	0.590379	0.0011442
GOBP_CD4_POSITIVE_CD25_POSITIVE_ALPHA_BETA_REGULATORY_T_CELL_DIFFERENTIATION	0.589516	0.00118245
GOBP_NEGATIVE_REGULATION_OF_CELLULAR_RESPONSE_TO_TRANSFORMING_GROWTH_FACTOR_BETA_STIMULUS	0.589146	0.0011992
GOBP_NEGATIVE_REGULATION_OF_IRE1_MEDIATED_UNFOLDED_PROTEIN_RESPONSE	0.589023	0.00120484
GOBP_SPHINGOMYELIN_METABOLIC_PROCESS	0.589023	0.00120484
GOBP_TERTIARY_ALCOHOL_METABOLIC_PROCESS	0.588776	0.00121618
GOBP_NUCLEOTIDE_SUGAR_TRANSMEMBRANE_TRANSPORT	0.588652	0.00122188
GOBP_INTRACELLULAR_POTASSIUM_ION_HOMEOSTASIS	0.588529	0.00122762
GOBP_ORGANIC_HYDROXY_COMPOUND_METABOLIC_PROCESS	0.588282	0.00123915
GOBP_CELLULAR_RESPONSE_TO_XENOBIOTIC_STIMULUS	0.587542	0.00127438
GOBP_TOXIN_METABOLIC_PROCESS	0.587542	0.00127438
GOBP_REGULATION_OF_LEUKOCYTE_ADHESION_TO_ARTERIAL_ENDOTHELIAL_CELL	0.587172	0.00129233
GOBP_MAGNESIUM_ION_HOMEOSTASIS	0.586679	0.00131664
GOBP_SULFATION	0.586556	0.00132278
GOBP_ANDROGEN_BIOSYNTHETIC_PROCESS	0.586432	0.00132895
GOBP_OXALATE_TRANSPORT	0.586309	0.00133515
GOBP_POSITIVE_REGULATION_OF_SKELETAL_MUSCLE_FIBER_DEVELOPMENT	0.585939	0.0013539
GOBP_ACETYLCHOLINE_SECRETION	0.585692	0.00136653
GOBP_CENTRAL_NERVOUS_SYSTEM_MYELIN_MAINTENANCE	0.585569	0.00137289
GOBP_MONOATOMIC_ION_TRANSMEMBRANE_TRANSPORT	0.585446	0.00137927
GOBP_RETINAL_METABOLIC_PROCESS	0.584212	0.00144465
GOBP_NEURON_REMODELING	0.583842	0.00146482
GOBP_POSITIVE_REGULATION_OF_SYNAPTIC_TRANSMISSION	0.583472	0.00148524
GOBP_CARDIAC_MUSCLE_CELL_ACTION_POTENTIAL	0.582979	0.00151289
GOBP_POSITIVE_REGULATION_OF_STRIATED_MUSCLE_CELL_APOPTOTIC_PROCESS	0.582115	0.00156241
GOBP_NEGATIVE_REGULATION_OF_CAMP_MEDIATED_SIGNALING	0.581129	0.00162085
GOBP_INTESTINAL_STEM_CELL_HOMEOSTASIS	0.580882	0.00163577
GOBP_PHOSPHOLIPID_BIOSYNTHETIC_PROCESS	0.580635	0.00165081
GOBP_RETINA_HOMEOSTASIS	0.580265	0.00167363
GOBP_REGULATION_OF_HIGH_VOLTAGE_GATED_CALCIUM_CHANNEL_ACTIVITY	0.580142	0.00168129
GOBP_GLYCOSIDE_METABOLIC_PROCESS	0.579525	0.00172012
GOBP_ACTION_POTENTIAL	0.579155	0.00174382
GOBP_REGULATION_OF_ENDOSOME_TO_PLASMA_MEMBRANE_PROTEIN_TRANSPORT	0.578538	0.00178398
GOBP_ORGANIC_CATION_TRANSPORT	0.578168	0.00180848
GOBP_PEPTIDE_TRANSPORT	0.577552	0.00185001
GOBP_STEROID_HORMONE_BIOSYNTHETIC_PROCESS	0.576688	0.00190964
GOBP_TRANSMEMBRANE_TRANSPORT	0.576565	0.0019183
GOBP_REGULATION_OF_SKELETAL_MUSCLE_FIBER_DEVELOPMENT	0.576318	0.00193573
GOBP_ISOPRENOID_METABOLIC_PROCESS	0.575578	0.0019889
GOBP_PRESYNAPTIC_ACTIVE_ZONE_ORGANIZATION	0.575578	0.0019889
GOBP_CELLULAR_RESPONSE_TO_ALDOSTERONE	0.575085	0.00202509
GOBP_SEBACEOUS_GLAND_DEVELOPMENT	0.574468	0.00207119
GOBP_WHITE_FAT_CELL_DIFFERENTIATION	0.574345	0.00208052
GOBP_GLYCOSIDE_TRANSPORT	0.573851	0.00211825
GOBP_REGULATION_OF_FATTY_ACID_OXIDATION	0.573358	0.0021566
GOBP_CARDIAC_MUSCLE_CELL_CONTRACTION	0.571631	0.00229594
GOBP_POSITIVE_REGULATION_OF_INSULIN_SECRETION	0.571385	0.00231651
GOBP_NEGATIVE_REGULATION_OF_FATTY_ACID_OXIDATION	0.570768	0.00236868
GOBP_REGULATION_OF_INSULIN_SECRETION_INVOLVED_IN_CELLULAR_RESPONSE_TO_GLUCOSE_STIMULUS	0.570028	0.0024327
GOBP_PHOTOTRANSDUCTION	0.569041	0.00252055
GOBP_AMINO_SUGAR_BIOSYNTHETIC_PROCESS	0.568918	0.00253173
GOBP_RIBONUCLEOSIDE_DIPHOSPHATE_CATABOLIC_PROCESS	0.568548	0.00256556
GOBP_GLYCOSYLATION	0.568301	0.00258834
GOBP_GLANDULAR_EPITHELIAL_CELL_DIFFERENTIATION	0.568178	0.0025998
GOBP_AUDITORY_RECEPTOR_CELL_MORPHOGENESIS	0.566574	0.00275309
GOBP_ETHANOL_OXIDATION	0.566081	0.0028019
GOBP_RETINA_MORPHOGENESIS_IN_CAMERA_TYPE_EYE	0.565834	0.00282661
GOBP_MAINTENANCE_OF_PRESYNAPTIC_ACTIVE_ZONE_STRUCTURE	0.565464	0.00286404
GOBP_BARBED_END_ACTIN_FILAMENT_CAPPING	0.565341	0.00287662
GOBP_POSITIVE_REGULATION_OF_PEPTIDE_SECRETION	0.564477	0.00296609
GOBP_GLYCEROL_TRANSMEMBRANE_TRANSPORT	0.564354	0.00297908
GOBP_INORGANIC_ION_IMPORT_ACROSS_PLASMA_MEMBRANE	0.563984	0.00301836
GOBP_INTRACELLULAR_SODIUM_ION_HOMEOSTASIS	0.563121	0.00311187
GOBP_NEUROTRANSMITTER_CATABOLIC_PROCESS	0.562627	0.00316649
GOBP_DETOXIFICATION_OF_COPPER_ION	0.561147	0.00333569
GOBP_REGULATION_OF_GLUCOSE_IMPORT	0.561147	0.00333569
GOBP_CELLULAR_LIPID_CATABOLIC_PROCESS	0.56016	0.00345305
GOBP_POSITIVE_REGULATION_OF_GLUCOSE_IMPORT	0.56016	0.00345305
GOBP_CELLULAR_RESPONSE_TO_ZINC_ION	0.558434	0.00366759
GOBP_MATURE_CONVENTIONAL_DENDRITIC_CELL_DIFFERENTIATION	0.556953	0.00386114
GOBP_REGULATION_OF_CARDIAC_MUSCLE_CELL_ACTION_POTENTIAL	0.55646	0.00392771
GOBP_FOREBRAIN_VENTRICULAR_ZONE_PROGENITOR_CELL_DIVISION	0.556213	0.00396139
GOBP_REGULATION_OF_LONG_TERM_NEURONAL_SYNAPTIC_PLASTICITY	0.554733	0.00416908
GOBP_AMYLOID_BETA_METABOLIC_PROCESS	0.554117	0.00425852
GOBP_GLYCOSIDE_CATABOLIC_PROCESS	0.55387	0.00429479
GOBP_REGULATION_OF_NEUROTRANSMITTER_RECEPTOR_ACTIVITY	0.553623	0.00433134
GOBP_INSULIN_SECRETION_INVOLVED_IN_CELLULAR_RESPONSE_TO_GLUCOSE_STIMULUS	0.553006	0.00442396
GOBP_CAVEOLIN_MEDIATED_ENDOCYTOSIS	0.55276	0.00446151
GOBP_CELLULAR_RESPONSE_TO_GLUCOCORTICOID_STIMULUS	0.55276	0.00446151
GOBP_REGULATION_OF_TRANSPORTER_ACTIVITY	0.552636	0.0044804
GOBP_RESPONSE_TO_STIMULUS_INVOLVED_IN_REGULATION_OF_MUSCLE_ADAPTATION	0.552513	0.00449936
GOBP_REGULATION_OF_PROTEIN_SECRETION	0.55239	0.00451839
GOBP_HORMONE_TRANSPORT	0.551773	0.00461467
GOBP_REGULATION_OF_FEMALE_RECEPTIVITY	0.55128	0.00469304
GOBP_ORGAN_OR_TISSUE_SPECIFIC_IMMUNE_RESPONSE	0.551033	0.00473268
GOBP_REGULATION_OF_HEART_RATE	0.551033	0.00473268
GOBP_GLYCEROLIPID_BIOSYNTHETIC_PROCESS	0.55091	0.00475261
GOBP_MULTICELLULAR_ORGANISMAL_RESPONSE_TO_STRESS	0.550786	0.00477262
GOBP_REGULATION_OF_NMDA_RECEPTOR_ACTIVITY	0.550663	0.00479271
GOBP_SENSORY_PERCEPTION_OF_TASTE	0.550663	0.00479271
GOBP_GLYCEROPHOSPHOLIPID_BIOSYNTHETIC_PROCESS	0.55054	0.00481288
GOBP_CELLULAR_RESPONSE_TO_MINERALOCORTICOID_STIMULUS	0.550293	0.00485344
GOBP_N_ACYLETHANOLAMINE_METABOLIC_PROCESS	0.55017	0.00487384
GOBP_STEROID_METABOLIC_PROCESS	0.550046	0.00489432
GOBP_SYNAPTIC_VESICLE_DOCKING	0.549676	0.00495622
GOBP_MAINTENANCE_OF_PROTEIN_LOCALIZATION_IN_ENDOPLASMIC_RETICULUM	0.549306	0.00501885
GOBP_POSITIVE_REGULATION_OF_LONG_TERM_NEURONAL_SYNAPTIC_PLASTICITY	0.549306	0.00501885
GOBP_CHOLINE_METABOLIC_PROCESS	0.54906	0.005061
GOBP_PHOSPHATIDYLCHOLINE_METABOLIC_PROCESS	0.548936	0.00508219
GOBP_MATING_BEHAVIOR	0.548196	0.00521108
GOBP_ESTABLISHMENT_OF_PROTEIN_LOCALIZATION_TO_PLASMA_MEMBRANE	0.546839	0.00545517
GOBP_NEGATIVE_REGULATION_OF_LIPID_METABOLIC_PROCESS	0.546839	0.00545517
GOBP_IONOTROPIC_GLUTAMATE_RECEPTOR_SIGNALING_PATHWAY	0.546716	0.00547787
GOBP_MALE_SEX_DIFFERENTIATION	0.546593	0.00550066
GOBP_RESPONSE_TO_HISTAMINE	0.546593	0.00550066
GOBP_NEGATIVE_REGULATION_OF_MYELINATION	0.545853	0.00563921
GOBP_CAMERA_TYPE_EYE_PHOTORECEPTOR_CELL_DIFFERENTIATION	0.544866	0.0058289
GOBP_SYNAPTIC_VESICLE_EXOCYTOSIS	0.544496	0.00590153
GOBP_GOLGI_VESICLE_BUDDING	0.544372	0.00592592
GOBP_ADENOSINE_METABOLIC_PROCESS	0.544126	0.00597498
GOBP_REGULATION_OF_STORE_OPERATED_CALCIUM_CHANNEL_ACTIVITY	0.543879	0.00602441
GOBP_RETINAL_ROD_CELL_DEVELOPMENT	0.543879	0.00602441
GOBP_UDP_GLUCOSE_METABOLIC_PROCESS	0.543879	0.00602441
GOBP_AUTOPHAGOSOME_ORGANIZATION	0.543756	0.00604926
GOBP_REGULATION_OF_MEMBRANE_LIPID_DISTRIBUTION	0.543632	0.00607421
GOBP_CARBOHYDRATE_TRANSMEMBRANE_TRANSPORT	0.543386	0.00612439
GOBP_REGULATION_OF_CHLORIDE_TRANSPORT	0.542029	0.00640722
GOBP_IRON_COORDINATION_ENTITY_TRANSPORT	0.541659	0.00648639
GOBP_VESICLE_BUDDING_FROM_MEMBRANE	0.541412	0.00653967
GOBP_SPHINGOLIPID_METABOLIC_PROCESS	0.541042	0.00662034
GOBP_MOTOR_NEURON_APOPTOTIC_PROCESS	0.540549	0.00672931
GOBP_NEGATIVE_REGULATION_OF_CELLULAR_EXTRAVASATION	0.540549	0.00672931
GOBP_GLYCOSYLCERAMIDE_BIOSYNTHETIC_PROCESS	0.539932	0.00686783
GOBP_INNER_EAR_AUDITORY_RECEPTOR_CELL_DIFFERENTIATION	0.539192	0.00703748
GOBP_RESPONSE_TO_MERCURY_ION	0.538699	0.00715269
GOBP_GLUCOSE_IMPORT	0.537959	0.00732875
GOBP_SYNAPTIC_VESICLE_MEMBRANE_ORGANIZATION	0.537959	0.00732875
GOBP_ANTIMICROBIAL_PEPTIDE_PRODUCTION	0.537589	0.00741825
GOBP_REGULATION_OF_GERM_CELL_PROLIFERATION	0.537589	0.00741825
GOBP_NEGATIVE_REGULATION_OF_AMYLOID_PRECURSOR_PROTEIN_BIOSYNTHETIC_PROCESS	0.537465	0.0074483
GOBP_NEGATIVE_REGULATION_OF_FATTY_ACID_METABOLIC_PROCESS	0.536972	0.00756963
GOBP_ONE_CARBON_COMPOUND_TRANSPORT	0.536972	0.00756963
GOBP_GALACTOLIPID_BIOSYNTHETIC_PROCESS	0.536725	0.00763097
GOBP_RECEPTOR_GUANYLYL_CYCLASE_SIGNALING_PATHWAY	0.536602	0.00766181
GOBP_PROTEIN_LOCALIZATION_TO_ENDOPLASMIC_RETICULUM_EXIT_SITE	0.536479	0.00769276
GOBP_FATTY_ACID_METABOLIC_PROCESS	0.536355	0.00772383
GOBP_REGULATION_OF_NK_T_CELL_PROLIFERATION	0.536355	0.00772383
GOBP_POSITIVE_REGULATION_OF_REACTIVE_OXYGEN_SPECIES_BIOSYNTHETIC_PROCESS	0.535368	0.00797651
GOBP_POSITIVE_REGULATION_OF_PHOSPHOLIPASE_A2_ACTIVITY	0.534998	0.00807319
GOBP_GLUCOSYLCERAMIDE_METABOLIC_PROCESS	0.534875	0.00810566
GOBP_REGULATION_OF_HORMONE_SECRETION	0.534628	0.00817094
GOBP_PHOSPHATIDYLSERINE_ACYL_CHAIN_REMODELING	0.534135	0.00830295
GOBP_ORGANIC_HYDROXY_COMPOUND_TRANSPORT	0.533765	0.00840323
GOBP_ACROSOMAL_VESICLE_EXOCYTOSIS	0.533518	0.0084707
GOBP_SODIUM_ION_TRANSPORT	0.532778	0.00867606
GOBP_HYDROCARBON_METABOLIC_PROCESS	0.532532	0.00874552
GOBP_GLYCOPROTEIN_METABOLIC_PROCESS	0.531792	0.00895694
GOBP_CARNITINE_TRANSMEMBRANE_TRANSPORT	0.531668	0.00899263
GOBP_MYCOTOXIN_METABOLIC_PROCESS	0.531668	0.00899263
GOBP_ALCOHOL_CATABOLIC_PROCESS	0.531051	0.00917301
GOBP_POSITIVE_REGULATION_OF_TRANSPORTER_ACTIVITY	0.530558	0.00931968
GOBP_FEEDING_BEHAVIOR	0.530311	0.00939381
GOBP_POSITIVE_REGULATION_OF_PROTEIN_SECRETION	0.529818	0.00954369
GOBP_ASPARTATE_METABOLIC_PROCESS	0.529695	0.0095815
GOBP_PROTEIN_O_LINKED_GLYCOSYLATION	0.529448	0.00965752
GOBP_VITAMIN_D3_METABOLIC_PROCESS	0.528955	0.00981122
GOBP_CELLULAR_RESPONSE_TO_ELECTRICAL_STIMULUS	0.528831	0.00985
GOBP_MONOATOMIC_CATION_TRANSPORT	0.528831	0.00985
GOBP_SECONDARY_METABOLIC_PROCESS	0.528831	0.00985
GOBP_VIRAL_RELEASE_FROM_HOST_CELL	0.527845	0.0101652
GOBP_ANDROGEN_METABOLIC_PROCESS	0.527721	0.0102053
GOBP_CAMP_MEDIATED_SIGNALING	0.527598	0.0102455
GOBP_SYNAPTIC_SIGNALING_VIA_NEUROPEPTIDE	0.527598	0.0102455
GOBP_AMINO_SUGAR_METABOLIC_PROCESS	0.527105	0.0104076
GOBP_BRANCHING_INVOLVED_IN_LABYRINTHINE_LAYER_MORPHOGENESIS	0.525871	0.0108234
GOBP_ENTEROENDOCRINE_CELL_DIFFERENTIATION	0.525871	0.0108234
GOBP_AMINOPHOSPHOLIPID_TRANSLOCATION	0.525748	0.0108658
GOBP_GOLGI_ORGANIZATION	0.525131	0.01108
GOBP_PROTEIN_LOCALIZATION_TO_POSTSYNAPSE	0.525131	0.01108
GOBP_MONOATOMIC_ANION_TRANSPORT	0.524638	0.0112542
GOBP_MONOATOMIC_ION_TRANSPORT	0.524638	0.0112542
GOBP_AV_NODE_CELL_TO_BUNDLE_OF_HIS_CELL_COMMUNICATION	0.524144	0.0114308
GOBP_POSITIVE_REGULATION_OF_HEART_RATE	0.524144	0.0114308
GOBP_CELLULAR_RESPONSE_TO_HISTAMINE	0.523651	0.0116099
GOBP_NEGATIVE_REGULATION_OF_PROTEIN_LOCALIZATION_TO_CELL_SURFACE	0.523651	0.0116099
GOBP_SPHINGOMYELIN_BIOSYNTHETIC_PROCESS	0.522911	0.0118835
GOBP_MEMBRANE_DEPOLARIZATION_DURING_CARDIAC_MUSCLE_CELL_ACTION_POTENTIAL	0.522664	0.0119759
GOBP_PLASMA_MEMBRANE_ORGANIZATION	0.522418	0.012069
GOBP_RESPONSE_TO_SALT_STRESS	0.522418	0.012069
GOBP_REGULATION_OF_INOSITOL_TRISPHOSPHATE_BIOSYNTHETIC_PROCESS	0.520567	0.0127887
GOBP_CELLULAR_RESPONSE_TO_SALT_STRESS	0.520197	0.0129372
GOBP_ORGANIC_HYDROXY_COMPOUND_CATABOLIC_PROCESS	0.520074	0.0129871
GOBP_REGULATION_OF_CELL_COMMUNICATION_BY_ELECTRICAL_COUPLING	0.519827	0.0130873
GOBP_EXOCYTIC_PROCESS	0.519581	0.0131882
GOBP_NUCLEOSIDE_DIPHOSPHATE_CATABOLIC_PROCESS	0.519581	0.0131882
GOBP_HORMONE_BIOSYNTHETIC_PROCESS	0.519211	0.0133409
GOBP_REGULATION_OF_BARBED_END_ACTIN_FILAMENT_CAPPING	0.519087	0.0133922
GOBP_PANCREAS_DEVELOPMENT	0.518471	0.0136512
GOBP_REGULATION_OF_SECRETION	0.518347	0.0137036
GOBP_GALACTOLIPID_METABOLIC_PROCESS	0.517237	0.0141829
GOBP_CELLULAR_ALDEHYDE_METABOLIC_PROCESS	0.516497	0.0145109
GOBP_BRUSH_BORDER_ASSEMBLY	0.51551	0.0149589
GOBP_ANTIBACTERIAL_PEPTIDE_PRODUCTION	0.514894	0.0152453
GOBP_NK_T_CELL_PROLIFERATION	0.514894	0.0152453
GOBP_MUSCLE_ATROPHY	0.514647	0.0153612
GOBP_CELL_COMMUNICATION_BY_ELECTRICAL_COUPLING_INVOLVED_IN_CARDIAC_CONDUCTION	0.514154	0.0155955
GOBP_REGULATION_OF_CORTISOL_BIOSYNTHETIC_PROCESS	0.51366	0.0158329
GOBP_GLYCOPROTEIN_BIOSYNTHETIC_PROCESS	0.513537	0.0158928
GOBP_POSITIVE_REGULATION_OF_HORMONE_SECRETION	0.513414	0.0159529
GOBP_MULTIVESICULAR_BODY_ORGANIZATION	0.513043	0.0161344
GOBP_REGULATION_OF_TRANSMEMBRANE_TRANSPORT	0.51292	0.0161953
GOBP_SUBSTANTIA_NIGRA_DEVELOPMENT	0.51292	0.0161953
GOBP_PROTEIN_LOCALIZATION_TO_SYNAPSE	0.512797	0.0162564
GOBP_DGMP_METABOLIC_PROCESS	0.512673	0.0163178
GOBP_HAIR_CELL_DIFFERENTIATION	0.51218	0.0165652
GOBP_INORGANIC_ANION_TRANSPORT	0.511563	0.0168793
GOBP_NEGATIVE_REGULATION_OF_STEROID_METABOLIC_PROCESS	0.511317	0.0170064
GOBP_ORGANOPHOSPHATE_CATABOLIC_PROCESS	0.51107	0.0171344
GOBP_STABILIZATION_OF_MEMBRANE_POTENTIAL	0.510823	0.0172633
GOBP_SENSORY_PERCEPTION_OF_MECHANICAL_STIMULUS	0.50996	0.0177212
GOBP_UDP_N_ACETYLGLUCOSAMINE_BIOSYNTHETIC_PROCESS	0.50996	0.0177212
GOBP_MONOCARBOXYLIC_ACID_METABOLIC_PROCESS	0.509343	0.0180551
GOBP_REGULATION_OF_ALCOHOL_BIOSYNTHETIC_PROCESS	0.509343	0.0180551
GOBP_PHOSPHATIDYLETHANOLAMINE_ACYL_CHAIN_REMODELING	0.508973	0.0182581
GOBP_PHOSPHATIDYLINOSITOL_MEDIATED_SIGNALING	0.50885	0.0183263
GOBP_NEGATIVE_REGULATION_OF_MONONUCLEAR_CELL_MIGRATION	0.508726	0.0183946
GOBP_REGULATION_OF_AUTOPHAGOSOME_ASSEMBLY	0.50848	0.018532
GOBP_STORE_OPERATED_CALCIUM_ENTRY	0.507493	0.0190911
GOBP_LATE_ENDOSOME_TO_VACUOLE_TRANSPORT	0.50737	0.019162
GOBP_REGULATION_OF_MEMBRANE_POTENTIAL	0.506753	0.0195203
GOBP_POSITIVE_REGULATION_OF_GLUCOSE_TRANSMEMBRANE_TRANSPORT	0.506136	0.0198847
GOBP_AMINO_ACID_BETAINE_METABOLIC_PROCESS	0.506013	0.0199583
GOBP_NEGATIVE_REGULATION_OF_PROTEIN_SECRETION	0.506013	0.0199583
GOBP_POSITIVE_REGULATION_OF_MUCUS_SECRETION	0.506013	0.0199583
GOBP_POSITIVE_REGULATION_OF_POTASSIUM_ION_TRANSMEMBRANE_TRANSPORTER_ACTIVITY	0.505643	0.0201806
GOBP_CANNABINOID_SIGNALING_PATHWAY	0.50515	0.0204805
GOBP_HYPEROSMOTIC_SALINITY_RESPONSE	0.503793	0.0213261
GOBP_ETHANOLAMINE_CONTAINING_COMPOUND_METABOLIC_PROCESS	0.502436	0.0222032
GOBP_OLIGOSACCHARIDE_CATABOLIC_PROCESS	0.500586	0.0234517
GOBP_PHOSPHATIDYLINOSITOL_BIOSYNTHETIC_PROCESS	0.500463	0.0235372
GOBP_REGULATION_OF_POTASSIUM_ION_TRANSMEMBRANE_TRANSPORTER_ACTIVITY	0.500463	0.0235372
GOBP_POSITIVE_REGULATION_OF_INSULIN_SECRETION_INVOLVED_IN_CELLULAR_RESPONSE_TO_GLUCOSE_STIMULUS	0.500339	0.0236229
GOBP_ACTIN_MEDIATED_CELL_CONTRACTION	0.500093	0.0237952
GOBP_GLUCOCORTICOID_BIOSYNTHETIC_PROCESS	0.499969	0.0238818
GOBP_B_CELL_PROLIFERATION_INVOLVED_IN_IMMUNE_RESPONSE	0.499106	0.0244959
GOBP_NEGATIVE_REGULATION_OF_SPROUTING_ANGIOGENESIS	0.499106	0.0244959
GOBP_REGULATION_OF_ADENYLATE_CYCLASE_ACTIVITY	0.498982	0.0245848
GOBP_REGULATION_OF_PHOSPHOLIPID_TRANSLOCATION	0.498859	0.0246739
GOBP_ALKALOID_METABOLIC_PROCESS	0.498736	0.0247634
GOBP_NEUROTRANSMITTER_SECRETION	0.498242	0.0251242
GOBP_REGULATION_OF_ENDOSOME_SIZE	0.498242	0.0251242
GOBP_SENSORY_PERCEPTION	0.498242	0.0251242
GOBP_SPHINGOLIPID_BIOSYNTHETIC_PROCESS	0.498119	0.0252151
GOBP_POSITIVE_REGULATION_OF_COLD_INDUCED_THERMOGENESIS	0.497749	0.0254897
GOBP_VESICLE_FUSION_TO_PLASMA_MEMBRANE	0.497749	0.0254897
GOBP_AMINOPHOSPHOLIPID_TRANSPORT	0.497502	0.0256743
GOBP_CARDIAC_MUSCLE_CELL_MEMBRANE_REPOLARIZATION	0.497379	0.025767
GOBP_MONOCARBOXYLIC_ACID_TRANSPORT	0.496639	0.0263298
GOBP_REGULATION_OF_CHOLESTEROL_METABOLIC_PROCESS	0.496392	0.0265199
GOBP_INTRACELLULAR_IRON_ION_HOMEOSTASIS	0.495652	0.0270975
GOBP_QUATERNARY_AMMONIUM_GROUP_TRANSPORT	0.495405	0.0272925
GOBP_SIGNAL_RELEASE	0.495035	0.0275874
GOBP_POSITIVE_REGULATION_OF_MUSCLE_TISSUE_DEVELOPMENT	0.494542	0.0279852
GOBP_PYRUVATE_TRANSPORT	0.494542	0.0279852
GOBP_POSITIVE_REGULATION_OF_AMYLOID_BETA_FORMATION	0.494295	0.028186
GOBP_EXOCYTOSIS	0.494172	0.0282868
GOBP_KERATAN_SULFATE_METABOLIC_PROCESS	0.493802	0.0285915
GOBP_SALIVA_SECRETION	0.493802	0.0285915
GOBP_LONG_CHAIN_FATTY_ACID_METABOLIC_PROCESS	0.493679	0.0286937
GOBP_NUCLEOSIDE_PHOSPHATE_CATABOLIC_PROCESS	0.493185	0.0291057
GOBP_IRE1_MEDIATED_UNFOLDED_PROTEIN_RESPONSE	0.493062	0.0292096
GOBP_NEUTRAL_LIPID_BIOSYNTHETIC_PROCESS	0.492939	0.0293138
GOBP_CELLULAR_HYPOTONIC_RESPONSE	0.492569	0.0296283
GOBP_DORSAL_VENTRAL_PATTERN_FORMATION	0.491829	0.0302666
GOBP_EXPORT_FROM_CELL	0.491335	0.030699
GOBP_REGULATION_OF_PROTEIN_KINASE_A_SIGNALING	0.491212	0.030808
GOBP_NEGATIVE_REGULATION_OF_CALCIUM_ION_IMPORT	0.490595	0.031358
GOBP_REGULATION_OF_IRE1_MEDIATED_UNFOLDED_PROTEIN_RESPONSE	0.490595	0.031358
GOBP_PROTEIN_LOCALIZATION_TO_AXON	0.490225	0.0316923
GOBP_INTRACELLULAR_ZINC_ION_HOMEOSTASIS	0.489608	0.0322566
GOBP_REGULATION_OF_GLUCOCORTICOID_BIOSYNTHETIC_PROCESS	0.489608	0.0322566
GOBP_PROTEIN_LOCALIZATION_TO_GOLGI_APPARATUS	0.489115	0.0327145
GOBP_AMINE_CATABOLIC_PROCESS	0.488992	0.0328299
GOBP_REGULATION_OF_RESPIRATORY_BURST	0.488252	0.0335299
GOBP_CELLULAR_RESPONSE_TO_LAMINAR_FLUID_SHEAR_STRESS	0.487882	0.033885
GOBP_VIRION_ASSEMBLY	0.487265	0.0344843
GOBP_CELLULAR_RESPONSE_TO_NITROGEN_STARVATION	0.486525	0.035216
GOBP_CHITIN_METABOLIC_PROCESS	0.486525	0.035216
GOBP_POSITIVE_REGULATION_OF_AMYLOID_PRECURSOR_PROTEIN_CATABOLIC_PROCESS	0.486278	0.035463
GOBP_NEGATIVE_REGULATION_OF_CHOLESTEROL_EFFLUX	0.486155	0.0355871
GOBP_ARACHIDONIC_ACID_SECRETION	0.485785	0.0359617
GOBP_NEURAL_NUCLEUS_DEVELOPMENT	0.485415	0.0363399
GOBP_REGULATION_OF_MITOTIC_SPINDLE_ASSEMBLY	0.485168	0.036594
GOBP_SUBSTRATE_DEPENDENT_CELL_MIGRATION_CELL_EXTENSION	0.485168	0.036594
GOBP_NEGATIVE_REGULATION_OF_NOREPINEPHRINE_SECRETION	0.484921	0.0368496
GOBP_SOMATOSTATIN_RECEPTOR_SIGNALING_PATHWAY	0.484921	0.0368496
GOBP_MEMBRANE_BIOGENESIS	0.484551	0.0372362
GOBP_INSULIN_METABOLIC_PROCESS	0.484428	0.0373658
GOBP_VESTIBULOCOCHLEAR_NERVE_DEVELOPMENT	0.484305	0.0374959
GOBP_CARDIAC_MUSCLE_CONTRACTION	0.482825	0.0390888
GOBP_METANEPHRIC_TUBULE_MORPHOGENESIS	0.482701	0.0392242
GOBP_STRIATED_MUSCLE_ATROPHY	0.482578	0.0393601
GOBP_SYNAPTIC_TRANSMISSION_GABAERGIC	0.482084	0.0399078
GOBP_PHOSPHOLIPID_METABOLIC_PROCESS	0.481838	0.0401842
GOBP_ALPHA_KETOGLUTARATE_TRANSPORT	0.481714	0.0403231
GOBP_CELL_COMMUNICATION_INVOLVED_IN_CARDIAC_CONDUCTION	0.481591	0.0404624
GOBP_CORTISOL_BIOSYNTHETIC_PROCESS	0.481591	0.0404624
GOBP_POSITIVE_REGULATION_OF_ADENYLATE_CYCLASE_ACTIVITY	0.481591	0.0404624
GOBP_DETOXIFICATION	0.481344	0.0407422
GOBP_POSITIVE_REGULATION_OF_ALCOHOL_BIOSYNTHETIC_PROCESS	0.481344	0.0407422
GOBP_POSTSYNAPTIC_SPECIALIZATION_ASSEMBLY	0.481344	0.0407422
GOBP_INNATE_IMMUNE_RESPONSE_IN_MUCOSA	0.480604	0.0415923
GOBP_NEGATIVE_REGULATION_OF_RECEPTOR_BINDING	0.480604	0.0415923
GOBP_AMIDE_TRANSPORT	0.480358	0.0418792
GOBP_INTRACELLULAR_NITROGEN_HOMEOSTASIS	0.480358	0.0418792
GOBP_ENDOSOME_TO_PLASMA_MEMBRANE_PROTEIN_TRANSPORT	0.480234	0.0420233
GOBP_INOSITOL_TRISPHOSPHATE_METABOLIC_PROCESS	0.480234	0.0420233
GOBP_ENDOPLASMIC_RETICULUM_TO_GOLGI_VESICLE_MEDIATED_TRANSPORT	0.479494	0.0428974
GOBP_LIPID_BIOSYNTHETIC_PROCESS	0.479494	0.0428974
GOBP_REGULATION_OF_CARDIAC_MUSCLE_CONTRACTION	0.479248	0.0431924
GOBP_RESPONSE_TO_CALCIUM_ION	0.479248	0.0431924
GOBP_FATTY_ACID_BETA_OXIDATION	0.478631	0.0439378
GOBP_POSITIVE_REGULATION_OF_TISSUE_REMODELING	0.478261	0.0443906
GOBP_REGULATION_OF_REGULATED_SECRETORY_PATHWAY	0.477767	0.0450008
GOBP_AUDITORY_RECEPTOR_CELL_DEVELOPMENT	0.477521	0.0453087
GOBP_CELL_COMMUNICATION_BY_ELECTRICAL_COUPLING	0.477521	0.0453087
GOBP_NEGATIVE_REGULATION_OF_SERINE_TYPE_ENDOPEPTIDASE_ACTIVITY	0.477397	0.0454634
GOBP_COBALAMIN_TRANSPORT	0.477151	0.0457741
GOBP_REGULATION_OF_RYANODINE_SENSITIVE_CALCIUM_RELEASE_CHANNEL_ACTIVITY	0.477151	0.0457741
GOBP_AMP_CATABOLIC_PROCESS	0.476781	0.0462439
GOBP_RESPONSE_TO_IMMOBILIZATION_STRESS	0.476534	0.0465594
GOBP_ACTIN_FILAMENT_BASED_MOVEMENT	0.476287	0.0468769
GOBP_TISSUE_HOMEOSTASIS	0.475917	0.0473568
GOBP_RESPONSE_TO_METAL_ION	0.475671	0.0476792
GOBP_PROTEIN_LOCALIZATION_TO_EXTRACELLULAR_REGION	0.475424	0.0480035
GOBP_CARNITINE_METABOLIC_PROCESS	0.475301	0.0481664
GOBP_CERAMIDE_BIOSYNTHETIC_PROCESS	0.474931	0.0486581
GOBP_MEMBRANE_REPOLARIZATION	0.474437	0.0493207
GOBP_POSITIVE_REGULATION_OF_TOLL_LIKE_RECEPTOR_2_SIGNALING_PATHWAY	0.474191	0.0496551
GOBP_NEGATIVE_REGULATION_OF_HIPPO_SIGNALING	-0.473944	0.0499914
GOBP_RIBOSOMAL_LARGE_SUBUNIT_EXPORT_FROM_NUCLEUS	-0.474067	0.049823
GOBP_FOLIC_ACID_METABOLIC_PROCESS	-0.474314	0.0494876
GOBP_MITOCHONDRIAL_OUTER_MEMBRANE_PERMEABILIZATION	-0.474931	0.0486581
GOBP_GTP_METABOLIC_PROCESS	-0.475424	0.0480035
GOBP_POSITIVE_REGULATION_OF_PROTEIN_LOCALIZATION_TO_CENTROSOME	-0.475547	0.0478411
GOBP_MRNA_PSEUDOURIDINE_SYNTHESIS	-0.475917	0.0473568
GOBP_POSITIVE_REGULATION_OF_MITOTIC_SISTER_CHROMATID_SEGREGATION	-0.476164	0.0470364
GOBP_TRNA_TRANSPORT	-0.476287	0.0468769
GOBP_STRESS_GRANULE_DISASSEMBLY	-0.476657	0.0464014
GOBP_RNA_SECONDARY_STRUCTURE_UNWINDING	-0.476781	0.0462439
GOBP_L_LYSINE_TRANSPORT	-0.476904	0.0460868
GOBP_POSITIVE_REGULATION_OF_IMMATURE_T_CELL_PROLIFERATION	-0.476904	0.0460868
GOBP_RNA_SURVEILLANCE	-0.477521	0.0453087
GOBP_STRESS_GRANULE_ASSEMBLY	-0.477644	0.0451545
GOBP_DNA_PROTECTION	-0.477891	0.0448475
GOBP_MITOCHONDRIAL_FUSION	-0.478014	0.0446947
GOBP_ORGANIC_CYCLIC_COMPOUND_CATABOLIC_PROCESS	-0.478014	0.0446947
GOBP_KINETOCHORE_ORGANIZATION	-0.478138	0.0445424
GOBP_POSITIVE_REGULATION_OF_PROTEIN_K63_LINKED_UBIQUITINATION	-0.478138	0.0445424
GOBP_POSITIVE_REGULATION_OF_AMINO_ACID_TRANSPORT	-0.478754	0.0437878
GOBP_PYRIMIDINE_DEOXYRIBONUCLEOSIDE_TRIPHOSPHATE_METABOLIC_PROCESS	-0.480111	0.0421679
GOBP_REGULATION_OF_SIGNAL_TRANSDUCTION_BY_P53_CLASS_MEDIATOR	-0.480234	0.0420233
GOBP_FERROPTOSIS	-0.480481	0.0417356
GOBP_NEGATIVE_REGULATION_OF_MITOCHONDRIAL_OUTER_MEMBRANE_PERMEABILIZATION_INVOLVED_IN_APOPTOTIC_SIGNALING_PATHWAY	-0.481344	0.0407422
GOBP_REGULATION_OF_CENTRIOLE_REPLICATION	-0.481344	0.0407422
GOBP_POSITIVE_REGULATION_OF_RNA_SPLICING	-0.481591	0.0404624
GOBP_BOX_C_D_SNORNP_ASSEMBLY	-0.481838	0.0401842
GOBP_PROTEIN_TRANSMEMBRANE_IMPORT_INTO_INTRACELLULAR_ORGANELLE	-0.481961	0.0400458
GOBP_SNRNA_TRANSCRIPTION_BY_RNA_POLYMERASE_III	-0.482701	0.0392242
GOBP_PROTEIN_LOCALIZATION_TO_NUCLEOLUS	-0.483195	0.0386849
GOBP_PROTEIN_INSERTION_INTO_MEMBRANE	-0.483565	0.0382849
GOBP_CHAPERONE_MEDIATED_PROTEIN_COMPLEX_ASSEMBLY	-0.483811	0.0380202
GOBP_CHROMOSOME_CONDENSATION	-0.484181	0.0376264
GOBP_REGULATION_OF_NUCLEOTIDE_EXCISION_REPAIR	-0.484181	0.0376264
GOBP_TRNA_THIO_MODIFICATION	-0.484181	0.0376264
GOBP_MRNA_SPLICE_SITE_RECOGNITION	-0.484551	0.0372362
GOBP_NEGATIVE_REGULATION_OF_CENTRIOLE_REPLICATION	-0.485661	0.0360874
GOBP_REGULATION_OF_CATABOLIC_PROCESS	-0.485661	0.0360874
GOBP_REGULATION_OF_MRNA_METABOLIC_PROCESS	-0.486401	0.0353393
GOBP_THYMOCYTE_APOPTOTIC_PROCESS	-0.486648	0.0350931
GOBP_FOREBRAIN_MORPHOGENESIS	-0.487018	0.0347267
GOBP_POSITIVE_REGULATION_OF_RNA_METABOLIC_PROCESS	-0.487635	0.0341236
GOBP_ATTACHMENT_OF_MITOTIC_SPINDLE_MICROTUBULES_TO_KINETOCHORE	-0.487758	0.0340041
GOBP_PROTEIN_DENEDDYLATION	-0.487758	0.0340041
GOBP_PROTEIN_K6_LINKED_UBIQUITINATION	-0.488375	0.0334123
GOBP_REGULATION_OF_MITOCHONDRIAL_FISSION	-0.488375	0.0334123
GOBP_INTRINSIC_APOPTOTIC_SIGNALING_PATHWAY_IN_RESPONSE_TO_DNA_DAMAGE	-0.488498	0.0332951
GOBP_PUTRESCINE_BIOSYNTHETIC_PROCESS	-0.488745	0.0330617
GOBP_PEPTIDYL_ARGININE_MODIFICATION	-0.489238	0.0325994
GOBP_DNA_METHYLATION	-0.489485	0.0323705
GOBP_POSITIVE_REGULATION_OF_STEM_CELL_POPULATION_MAINTENANCE	-0.489485	0.0323705
GOBP_POSITIVE_REGULATION_OF_BICELLULAR_TIGHT_JUNCTION_ASSEMBLY	-0.489608	0.0322566
GOBP_NEGATIVE_REGULATION_OF_DNA_RECOMBINATION	-0.489978	0.0319169
GOBP_CHROMOSOME_LOCALIZATION	-0.491088	0.0309173
GOBP_POSITIVE_REGULATION_OF_HISTONE_DEACETYLATION	-0.491459	0.0305904
GOBP_REGULATION_OF_HISTONE_DEACETYLATION	-0.491459	0.0305904
GOBP_SMALL_NUCLEOLAR_RIBONUCLEOPROTEIN_COMPLEX_ASSEMBLY	-0.491705	0.0303742
GOBP_RRNA_PSEUDOURIDINE_SYNTHESIS	-0.492569	0.0296283
GOBP_L_AMINO_ACID_TRANSPORT	-0.492815	0.0294183
GOBP_MEIOTIC_SPINDLE_ASSEMBLY	-0.492815	0.0294183
GOBP_POSITIVE_REGULATION_OF_TELOMERE_MAINTENANCE_VIA_TELOMERE_LENGTHENING	-0.493555	0.0287962
GOBP_REGULATION_OF_MICROTUBULE_NUCLEATION	-0.493925	0.0284896
GOBP_REGULATION_OF_MRNA_PROCESSING	-0.493925	0.0284896
GOBP_KINETOCHORE_ASSEMBLY	-0.494172	0.0282868
GOBP_SERINE_TRANSPORT	-0.494172	0.0282868
GOBP_POSITIVE_REGULATION_OF_UBIQUITIN_PROTEIN_LIGASE_ACTIVITY	-0.494295	0.028186
GOBP_NUCLEAR_PORE_ORGANIZATION	-0.494419	0.0280854
GOBP_TRYPTOPHAN_TRANSPORT	-0.494419	0.0280854
GOBP_PORE_COMPLEX_ASSEMBLY	-0.494665	0.0278853
GOBP_NOTOCHORD_DEVELOPMENT	-0.495035	0.0275874
GOBP_RRNA_METHYLATION	-0.495159	0.0274888
GOBP_NEGATIVE_REGULATION_OF_ORGAN_GROWTH	-0.495652	0.0270975
GOBP_HOMOLOGOUS_RECOMBINATION	-0.496146	0.0267112
GOBP_NEGATIVE_REGULATION_OF_NEUROTRANSMITTER_SECRETION	-0.496392	0.0265199
GOBP_REGULATION_OF_MAINTENANCE_OF_SISTER_CHROMATID_COHESION	-0.496639	0.0263298
GOBP_EMBRYONIC_CLEAVAGE	-0.496762	0.0262353
GOBP_G2_MI_TRANSITION_OF_MEIOTIC_CELL_CYCLE	-0.496762	0.0262353
GOBP_REGULATION_OF_PROTEIN_K63_LINKED_UBIQUITINATION	-0.497626	0.0255819
GOBP_POST_ANAL_TAIL_MORPHOGENESIS	-0.497749	0.0254897
GOBP_POSITIVE_REGULATION_OF_INTRINSIC_APOPTOTIC_SIGNALING_PATHWAY	-0.498366	0.0250336
GOBP_MACROMOLECULE_CATABOLIC_PROCESS	-0.498489	0.0249432
GOBP_TRNA_3_END_PROCESSING	-0.498859	0.0246739
GOBP_INTERNAL_PROTEIN_AMINO_ACID_ACETYLATION	-0.499229	0.0244073
GOBP_REGULATION_OF_DOPAMINE_RECEPTOR_SIGNALING_PATHWAY	-0.499352	0.024319
GOBP_HOMOLOGOUS_CHROMOSOME_SEGREGATION	-0.499599	0.0241433
GOBP_U2_TYPE_PRESPLICEOSOME_ASSEMBLY	-0.500216	0.0237089
GOBP_DNA_REPLICATION_SYNTHESIS_OF_RNA_PRIMER	-0.500339	0.0236229
GOBP_NUCLEAR_TRANSCRIBED_MRNA_CATABOLIC_PROCESS_EXONUCLEOLYTIC	-0.500709	0.0233666
GOBP_GMP_SALVAGE	-0.500956	0.0231971
GOBP_NEGATIVE_REGULATION_OF_RNA_SPLICING	-0.500956	0.0231971
GOBP_POSITIVE_REGULATION_OF_MAINTENANCE_OF_SISTER_CHROMATID_COHESION	-0.501079	0.0231127
GOBP_NEGATIVE_REGULATION_OF_TRANSCRIPTION_BY_RNA_POLYMERASE_I	-0.501326	0.0229449
GOBP_REGULATION_OF_RRNA_PROCESSING	-0.501326	0.0229449
GOBP_ANTEROGRADE_AXONAL_TRANSPORT	-0.501696	0.0226952
GOBP_CHROMOSOME_MOVEMENT_TOWARDS_SPINDLE_POLE	-0.501943	0.0225301
GOBP_RESPONSE_TO_CELL_CYCLE_CHECKPOINT_SIGNALING	-0.501943	0.0225301
GOBP_POSITIVE_REGULATION_OF_POST_TRANSCRIPTIONAL_GENE_SILENCING	-0.502313	0.0222845
GOBP_AMINO_ACID_TRANSMEMBRANE_TRANSPORT	-0.503793	0.0213261
GOBP_POSITIVE_REGULATION_OF_ISOTYPE_SWITCHING	-0.504039	0.02117
GOBP_POSITIVE_REGULATION_OF_VESICLE_TRANSPORT_ALONG_MICROTUBULE	-0.504039	0.02117
GOBP_SPLICEOSOMAL_COMPLEX_ASSEMBLY	-0.504409	0.0209379
GOBP_TRANSLESION_SYNTHESIS	-0.504656	0.0207844
GOBP_AMINO_ACID_ACTIVATION	-0.50478	0.0207081
GOBP_MITOCHONDRIAL_DNA_METABOLIC_PROCESS	-0.505396	0.0203301
GOBP_SPINDLE_ASSEMBLY_INVOLVED_IN_FEMALE_MEIOSIS	-0.50589	0.0200322
GOBP_NUCLEAR_TRANSCRIBED_MRNA_CATABOLIC_PROCESS_NONSENSE_MEDIATED_DECAY	-0.506876	0.0194482
GOBP_DNA_SYNTHESIS_INVOLVED_IN_DNA_REPAIR	-0.507	0.0193763
GOBP_FEMALE_MEIOSIS_CHROMOSOME_SEGREGATION	-0.507123	0.0193046
GOBP_EMBRYONIC_NEUROCRANIUM_MORPHOGENESIS	-0.50737	0.019162
GOBP_WNT_SIGNALING_PATHWAY_INVOLVED_IN_MIDBRAIN_DOPAMINERGIC_NEURON_DIFFERENTIATION	-0.507493	0.0190911
GOBP_MRNA_CATABOLIC_PROCESS	-0.507986	0.0188097
GOBP_POSITIVE_REGULATION_OF_RETINOIC_ACID_RECEPTOR_SIGNALING_PATHWAY	-0.507986	0.0188097
GOBP_PROTEASOME_ASSEMBLY	-0.50811	0.0187399
GOBP_STRAND_INVASION	-0.50811	0.0187399
GOBP_NEGATIVE_REGULATION_OF_CELL_DIVISION	-0.50885	0.0183263
GOBP_PYRIMIDINE_CONTAINING_COMPOUND_TRANSMEMBRANE_TRANSPORT	-0.50922	0.0181225
GOBP_FORMATION_OF_TRANSLATION_PREINITIATION_COMPLEX	-0.509713	0.0178541
GOBP_TRNA_THREONYLCARBAMOYLADENOSINE_METABOLIC_PROCESS	-0.50996	0.0177212
GOBP_NEUTRAL_AMINO_ACID_TRANSPORT	-0.51033	0.0175236
GOBP_NUCLEOSIDE_SALVAGE	-0.51033	0.0175236
GOBP_SPERMINE_METABOLIC_PROCESS	-0.510453	0.0174582
GOBP_AMIDE_BIOSYNTHETIC_PROCESS	-0.5107	0.017328
GOBP_PYRIMIDINE_CONTAINING_COMPOUND_BIOSYNTHETIC_PROCESS	-0.510947	0.0171987
GOBP_POSITIVE_REGULATION_OF_NUCLEAR_DIVISION	-0.511317	0.0170064
GOBP_POLYADENYLATION_DEPENDENT_SNORNA_3_END_PROCESSING	-0.511563	0.0168793
GOBP_TRNA_PROCESSING	-0.511563	0.0168793
GOBP_IRES_DEPENDENT_VIRAL_TRANSLATIONAL_INITIATION	-0.51181	0.016753
GOBP_REGULATION_OF_MITOCHONDRIAL_GENE_EXPRESSION	-0.51181	0.016753
GOBP_BASE_EXCISION_REPAIR	-0.511933	0.0166902
GOBP_NEGATIVE_REGULATION_OF_CELLULAR_SENESCENCE	-0.512057	0.0166276
GOBP_POSITIVE_REGULATION_OF_AUTOPHAGY_OF_MITOCHONDRION	-0.51255	0.0163793
GOBP_REGULATION_OF_RNA_EXPORT_FROM_NUCLEUS	-0.512673	0.0163178
GOBP_PROTEIN_TARGETING_TO_MITOCHONDRION	-0.51292	0.0161953
GOBP_IMMUNOGLOBULIN_V_D_J_RECOMBINATION	-0.51329	0.0160132
GOBP_POSITIVE_REGULATION_OF_CHROMATIN_BINDING	-0.513537	0.0158928
GOBP_CENTROMERIC_SISTER_CHROMATID_COHESION	-0.513784	0.0157733
GOBP_PURINE_RIBONUCLEOSIDE_SALVAGE	-0.51403	0.0156545
GOBP_REGULATION_OF_TRANSLATIONAL_FIDELITY	-0.514277	0.0155366
GOBP_MEIOTIC_CELL_CYCLE_CHECKPOINT_SIGNALING	-0.514647	0.0153612
GOBP_REGULATION_BY_VIRUS_OF_VIRAL_PROTEIN_LEVELS_IN_HOST_CELL	-0.515757	0.0148458
GOBP_REGULATION_OF_TELOMERE_MAINTENANCE_IN_RESPONSE_TO_DNA_DAMAGE	-0.516374	0.0145663
GOBP_PURINE_NUCLEOTIDE_SALVAGE	-0.516497	0.0145109
GOBP_IN_UTERO_EMBRYONIC_DEVELOPMENT	-0.516867	0.0143461
GOBP_REGULATION_OF_CELL_CYCLE_G1_S_PHASE_TRANSITION	-0.517237	0.0141829
GOBP_PEPTIDYL_LYSINE_METHYLATION	-0.51773	0.013968
GOBP_ARGININE_CATABOLIC_PROCESS	-0.518101	0.0138088
GOBP_RNA_CAPPING	-0.518224	0.0137561
GOBP_HOMOLOGOUS_CHROMOSOME_PAIRING_AT_MEIOSIS	-0.518471	0.0136512
GOBP_REGULATION_OF_DNA_STRAND_ELONGATION	-0.518471	0.0136512
GOBP_NEGATIVE_REGULATION_OF_INTRINSIC_APOPTOTIC_SIGNALING_PATHWAY	-0.519334	0.0132899
GOBP_REGULATION_OF_CHROMOSOME_CONDENSATION	-0.519334	0.0132899
GOBP_VIRAL_RNA_GENOME_REPLICATION	-0.519457	0.0132389
GOBP_PROTEIN_ACYLATION	-0.519951	0.0130371
GOBP_HEMATOPOIETIC_STEM_CELL_PROLIFERATION	-0.520197	0.0129372
GOBP_PSEUDOURIDINE_SYNTHESIS	-0.520444	0.012838
GOBP_TRNA_MODIFICATION	-0.520444	0.012838
GOBP_L_ALPHA_AMINO_ACID_TRANSMEMBRANE_TRANSPORT	-0.521431	0.0124481
GOBP_L_GLUTAMINE_IMPORT_ACROSS_PLASMA_MEMBRANE	-0.521431	0.0124481
GOBP_REGULATION_OF_TRANSLATIONAL_TERMINATION	-0.521431	0.0124481
GOBP_CHORION_DEVELOPMENT	-0.521801	0.0123047
GOBP_NEGATIVE_REGULATION_OF_MEIOTIC_CELL_CYCLE	-0.522171	0.0121628
GOBP_G_QUADRUPLEX_DNA_UNWINDING	-0.522418	0.012069
GOBP_POSITIVE_REGULATION_OF_HISTONE_METHYLATION	-0.522418	0.012069
GOBP_REGULATION_OF_MEIOTIC_CELL_CYCLE_PHASE_TRANSITION	-0.522418	0.012069
GOBP_OUTER_MITOCHONDRIAL_MEMBRANE_ORGANIZATION	-0.522541	0.0120224
GOBP_REGULATION_OF_PROTEIN_ACETYLATION	-0.522911	0.0118835
GOBP_RESPONSE_TO_HYDROXYUREA	-0.522911	0.0118835
GOBP_FORMATION_OF_CYTOPLASMIC_TRANSLATION_INITIATION_COMPLEX	-0.523034	0.0118375
GOBP_MITOCHONDRION_MORPHOGENESIS	-0.523651	0.0116099
GOBP_POSITIVE_REGULATION_OF_CYTOPLASMIC_TRANSLATION	-0.524761	0.0112104
GOBP_ATTACHMENT_OF_SPINDLE_MICROTUBULES_TO_KINETOCHORE	-0.525008	0.0111233
GOBP_REGULATION_OF_MITOCHONDRIAL_MEMBRANE_POTENTIAL	-0.525254	0.0110369
GOBP_XMP_METABOLIC_PROCESS	-0.525624	0.0109083
GOBP_CEREBELLAR_GRANULAR_LAYER_MORPHOGENESIS	-0.525871	0.0108234
GOBP_REGULATION_OF_HISTONE_H3_K4_METHYLATION	-0.525871	0.0108234
GOBP_NUCLEAR_TRANSCRIBED_MRNA_CATABOLIC_PROCESS_DEADENYLATION_DEPENDENT_DECAY	-0.526118	0.010739
GOBP_CO_TRANSCRIPTIONAL_RNA_3_END_PROCESSING_CLEAVAGE_AND_POLYADENYLATION_PATHWAY	-0.526241	0.0106971
GOBP_STEM_CELL_PROLIFERATION	-0.526241	0.0106971
GOBP_C_5_METHYLATION_OF_CYTOSINE	-0.526735	0.0105308
GOBP_SEXUAL_REPRODUCTION	-0.527721	0.0102053
GOBP_RNA_DESTABILIZATION	-0.528091	0.0100856
GOBP_DNA_DAMAGE_RESPONSE_SIGNAL_TRANSDUCTION_BY_P53_CLASS_MEDIATOR	-0.528461	0.00996715
GOBP_VASCULAR_ASSOCIATED_SMOOTH_MUSCLE_CELL_APOPTOTIC_PROCESS	-0.528708	0.00988891
GOBP_NEGATIVE_REGULATION_OF_MEIOTIC_NUCLEAR_DIVISION	-0.528955	0.00981122
GOBP_REGULATION_OF_MRNA_SPLICING_VIA_SPLICEOSOME	-0.529078	0.00977259
GOBP_POSITIVE_REGULATION_OF_MRNA_METABOLIC_PROCESS	-0.529448	0.00965752
GOBP_CELLULAR_RESPONSE_TO_PEPTIDOGLYCAN	-0.529571	0.00961944
GOBP_PROTEIN_INSERTION_INTO_MITOCHONDRIAL_INNER_MEMBRANE	-0.529571	0.00961944
GOBP_NUCLEOLAR_CHROMATIN_ORGANIZATION	-0.529695	0.0095815
GOBP_MEIOTIC_CELL_CYCLE_PHASE_TRANSITION	-0.530311	0.00939381
GOBP_MITOCHONDRIAL_RNA_METABOLIC_PROCESS	-0.530311	0.00939381
GOBP_PROTEIN_K63_LINKED_DEUBIQUITINATION	-0.530311	0.00939381
GOBP_ORGANELLE_TRANSPORT_ALONG_MICROTUBULE	-0.530558	0.00931968
GOBP_NEGATIVE_REGULATION_OF_UBIQUITIN_DEPENDENT_PROTEIN_CATABOLIC_PROCESS	-0.531175	0.00913667
GOBP_PEPTIDE_BIOSYNTHETIC_PROCESS	-0.531175	0.00913667
GOBP_PROTEIN_IMPORT_INTO_MITOCHONDRIAL_MATRIX	-0.531298	0.00910046
GOBP_PEPTIDE_METABOLIC_PROCESS	-0.531545	0.00902844
GOBP_REGULATION_OF_RESPIRATORY_SYSTEM_PROCESS	-0.531545	0.00902844
GOBP_ORGANELLE_ASSEMBLY	-0.532408	0.00878044
GOBP_FORMATION_OF_EXTRACHROMOSOMAL_CIRCULAR_DNA	-0.532655	0.00871073
GOBP_NEGATIVE_REGULATION_OF_MITOCHONDRIAL_FUSION	-0.533025	0.00860711
GOBP_TRNA_METABOLIC_PROCESS	-0.533518	0.0084707
GOBP_POSITIVE_REGULATION_OF_KERATINOCYTE_DIFFERENTIATION	-0.533888	0.00836968
GOBP_NUCLEOBASE_METABOLIC_PROCESS	-0.534382	0.00823671
GOBP_CELLULAR_RESPONSE_TO_INSULIN_LIKE_GROWTH_FACTOR_STIMULUS	-0.535122	0.00804085
GOBP_MICROTUBULE_ORGANIZING_CENTER_ORGANIZATION	-0.535615	0.00791264
GOBP_MEIOTIC_CHROMOSOME_SEGREGATION	-0.535739	0.00788088
GOBP_NUCLEOTIDE_EXCISION_REPAIR	-0.536602	0.00766181
GOBP_7_METHYLGUANOSINE_CAP_HYPERMETHYLATION	-0.537465	0.0074483
GOBP_REGULATION_OF_G2_MI_TRANSITION_OF_MEIOTIC_CELL_CYCLE	-0.537589	0.00741825
GOBP_POSITIVE_REGULATION_OF_ATTACHMENT_OF_SPINDLE_MICROTUBULES_TO_KINETOCHORE	-0.537712	0.0073883
GOBP_MITOCHONDRIAL_TRNA_PROCESSING	-0.538205	0.00726963
GOBP_BASE_EXCISION_REPAIR_GAP_FILLING	-0.538329	0.00724023
GOBP_NUCLEOSIDE_MONOPHOSPHATE_BIOSYNTHETIC_PROCESS	-0.538822	0.00712373
GOBP_CHORIONIC_TROPHOBLAST_CELL_DIFFERENTIATION	-0.539439	0.00698051
GOBP_RRNA_MODIFICATION	-0.539562	0.00695218
GOBP_POSITIVE_REGULATION_OF_CATECHOLAMINE_METABOLIC_PROCESS	-0.539932	0.00686783
GOBP_CELLULAR_METABOLIC_COMPOUND_SALVAGE	-0.540549	0.00672931
GOBP_POSITIVE_REGULATION_OF_DNA_TEMPLATED_DNA_REPLICATION	-0.540919	0.00664743
GOBP_PYRIMIDINE_RIBONUCLEOTIDE_BIOSYNTHETIC_PROCESS	-0.540919	0.00664743
GOBP_ASPARAGINE_METABOLIC_PROCESS	-0.541289	0.00656646
GOBP_MITOTIC_SISTER_CHROMATID_COHESION_CENTROMERIC	-0.541412	0.00653967
GOBP_MEIOTIC_CHROMOSOME_SEPARATION	-0.541659	0.00648639
GOBP_POSITIVE_REGULATION_OF_DOUBLE_STRAND_BREAK_REPAIR_VIA_HOMOLOGOUS_RECOMBINATION	-0.541782	0.0064599
GOBP_REGULATION_OF_MITOCHONDRIAL_FUSION	-0.542029	0.00640722
GOBP_NEGATIVE_REGULATION_OF_RNA_BIOSYNTHETIC_PROCESS	-0.542646	0.00627721
GOBP_POSITIVE_REGULATION_OF_ORGANELLE_ORGANIZATION	-0.542646	0.00627721
GOBP_PROTEIN_LOCALIZATION_TO_CHROMOSOME_CENTROMERIC_REGION	-0.542646	0.00627721
GOBP_REGULATION_OF_PROTEIN_OLIGOMERIZATION	-0.542892	0.00622589
GOBP_NEGATIVE_REGULATION_OF_ADIPOSE_TISSUE_DEVELOPMENT	-0.543879	0.00602441
GOBP_RNA_SPLICING	-0.543879	0.00602441
GOBP_REGULATION_OF_CELL_FATE_SPECIFICATION	-0.544126	0.00597498
GOBP_TELOMERE_MAINTENANCE_VIA_SEMI_CONSERVATIVE_REPLICATION	-0.544249	0.0059504
GOBP_PROTEIN_STABILIZATION	-0.544619	0.00587723
GOBP_RIBOSOME_ASSEMBLY	-0.544619	0.00587723
GOBP_BEHAVIORAL_RESPONSE_TO_COCAINE	-0.544866	0.0058289
GOBP_VITAMIN_B6_METABOLIC_PROCESS	-0.544866	0.0058289
GOBP_U4_SNRNA_3_END_PROCESSING	-0.546099	0.00559267
GOBP_ALANINE_TRANSPORT	-0.546593	0.00550066
GOBP_RNA_SPLICING_VIA_TRANSESTERIFICATION_REACTIONS	-0.547703	0.00529866
GOBP_TRANSCRIPTION_PREINITIATION_COMPLEX_ASSEMBLY	-0.547949	0.0052547
GOBP_PEPTIDYL_METHIONINE_MODIFICATION	-0.548196	0.00521108
GOBP_RIBOSOMAL_LARGE_SUBUNIT_ASSEMBLY	-0.548196	0.00521108
GOBP_INTERSTRAND_CROSS_LINK_REPAIR	-0.548689	0.00512483
GOBP_POSITIVE_REGULATION_OF_MITOCHONDRIAL_FISSION	-0.548689	0.00512483
GOBP_NEGATIVE_REGULATION_OF_GENE_EXPRESSION_VIA_CPG_ISLAND_METHYLATION	-0.548813	0.00510347
GOBP_REGULATION_OF_MRNA_EXPORT_FROM_NUCLEUS	-0.550416	0.00483312
GOBP_SPINDLE_LOCALIZATION	-0.55054	0.00481288
GOBP_REGULATORY_NCRNA_MEDIATED_GENE_SILENCING	-0.550663	0.00479271
GOBP_RIBOSOMAL_SMALL_SUBUNIT_BIOGENESIS	-0.550663	0.00479271
GOBP_EXIT_FROM_MITOSIS	-0.551033	0.00473268
GOBP_SOMATIC_STEM_CELL_POPULATION_MAINTENANCE	-0.551156	0.00471282
GOBP_PRIMARY_MIRNA_PROCESSING	-0.552143	0.00455668
GOBP_NEGATIVE_REGULATION_OF_CYTOKINESIS	-0.552266	0.0045375
GOBP_MRNA_5_SPLICE_SITE_RECOGNITION	-0.552883	0.0044427
GOBP_DOSAGE_COMPENSATION	-0.553006	0.00442396
GOBP_MRNA_3_END_PROCESSING	-0.553006	0.00442396
GOBP_SNRNA_3_END_PROCESSING	-0.553006	0.00442396
GOBP_PROTEIN_LOCALIZATION_TO_MICROTUBULE_ORGANIZING_CENTER	-0.553253	0.00438669
GOBP_NUCLEAR_TRANSCRIBED_MRNA_CATABOLIC_PROCESS_EXONUCLEOLYTIC_3_5	-0.553993	0.00427662
GOBP_POSITIVE_REGULATION_OF_MITOTIC_CELL_CYCLE_SPINDLE_ASSEMBLY_CHECKPOINT	-0.553993	0.00427662
GOBP_INTRACELLULAR_DISTRIBUTION_OF_MITOCHONDRIA	-0.554857	0.0041514
GOBP_GLYCOLYTIC_PROCESS_THROUGH_FRUCTOSE_6_PHOSPHATE	-0.555473	0.00406402
GOBP_DEVELOPMENT_OF_SECONDARY_SEXUAL_CHARACTERISTICS	-0.55646	0.00392771
GOBP_MITOCHONDRIAL_RNA_PROCESSING	-0.556583	0.00391097
GOBP_POSITIVE_REGULATION_OF_RRNA_PROCESSING	-0.55683	0.00387769
GOBP_POSITIVE_REGULATION_OF_PEPTIDYL_LYSINE_ACETYLATION	-0.556953	0.00386114
GOBP_POSTREPLICATION_REPAIR	-0.557447	0.00379561
GOBP_REGULATION_OF_MICROTUBULE_POLYMERIZATION	-0.558064	0.00371513
GOBP_TRNA_PSEUDOURIDINE_SYNTHESIS	-0.55831	0.00368338
GOBP_ANAPHASE_PROMOTING_COMPLEX_DEPENDENT_CATABOLIC_PROCESS	-0.558434	0.00366759
GOBP_NEGATIVE_REGULATION_OF_TELOMERE_MAINTENANCE	-0.558557	0.00365187
GOBP_RIBOSOMAL_LARGE_SUBUNIT_BIOGENESIS	-0.55868	0.00363621
GOBP_PURINE_NUCLEOSIDE_MONOPHOSPHATE_BIOSYNTHETIC_PROCESS	-0.558804	0.00362062
GOBP_REGULATION_OF_MITOCHONDRIAL_TRANSLATION	-0.55905	0.00358961
GOBP_DNA_TEMPLATED_DNA_REPLICATION_MAINTENANCE_OF_FIDELITY	-0.559667	0.00351314
GOBP_MRNA_PROCESSING	-0.56016	0.00345305
GOBP_NEGATIVE_REGULATION_OF_DNA_TEMPLATED_DNA_REPLICATION	-0.56053	0.0034086
GOBP_RNA_PROCESSING	-0.56053	0.0034086
GOBP_LIVER_REGENERATION	-0.56127	0.00332128
GOBP_PROTEIN_DNA_COMPLEX_DISASSEMBLY	-0.56127	0.00332128
GOBP_LENS_FIBER_CELL_MORPHOGENESIS	-0.561517	0.00329263
GOBP_PYRIMIDINE_NUCLEOTIDE_BIOSYNTHETIC_PROCESS	-0.56164	0.00327839
GOBP_POSITIVE_REGULATION_OF_DNA_TEMPLATED_TRANSCRIPTION_INITIATION	-0.562997	0.00312545
GOBP_MEIOSIS_I_CELL_CYCLE_PROCESS	-0.563737	0.00304481
GOBP_PYRIMIDINE_RIBONUCLEOSIDE_TRIPHOSPHATE_METABOLIC_PROCESS	-0.563737	0.00304481
GOBP_RNA_MODIFICATION	-0.564477	0.00296609
GOBP_MATURATION_OF_LSU_RRNA	-0.564601	0.00295315
GOBP_GMP_METABOLIC_PROCESS	-0.564971	0.00291465
GOBP_MITOTIC_DNA_INTEGRITY_CHECKPOINT_SIGNALING	-0.565464	0.00286404
GOBP_MITOTIC_G2_DNA_DAMAGE_CHECKPOINT_SIGNALING	-0.565464	0.00286404
GOBP_REGULATION_OF_HEMATOPOIETIC_STEM_CELL_DIFFERENTIATION	-0.565834	0.00282661
GOBP_RIBONUCLEOPROTEIN_COMPLEX_LOCALIZATION	-0.566821	0.00272898
GOBP_MODULATION_BY_HOST_OF_VIRAL_RNA_GENOME_REPLICATION	-0.567191	0.00269318
GOBP_CENTROSOME_SEPARATION	-0.567314	0.00268134
GOBP_RNA_CATABOLIC_PROCESS	-0.567314	0.00268134
GOBP_N_TERMINAL_PEPTIDYL_METHIONINE_ACETYLATION	-0.567438	0.00266955
GOBP_REGULATION_OF_METAPHASE_PLATE_CONGRESSION	-0.567561	0.00265781
GOBP_RIBONUCLEOSIDE_MONOPHOSPHATE_BIOSYNTHETIC_PROCESS	-0.567561	0.00265781
GOBP_POSITIVE_REGULATION_OF_SISTER_CHROMATID_COHESION	-0.567684	0.00264611
GOBP_SCHWANN_CELL_PROLIFERATION	-0.568054	0.00261131
GOBP_TELOMERE_MAINTENANCE_IN_RESPONSE_TO_DNA_DAMAGE	-0.568178	0.0025998
GOBP_ENDONUCLEOLYTIC_CLEAVAGE_IN_ITS1_TO_SEPARATE_SSU_RRNA_FROM_5_8S_RRNA_AND_LSU_RRNA_FROM_TRICISTRONIC_RRNA_TRANSCRIPT_SSU_RRNA_5_8S_RRNA_LSU_RRNA	-0.568301	0.00258834
GOBP_PURINE_CONTAINING_COMPOUND_SALVAGE	-0.568548	0.00256556
GOBP_DOUBLE_STRAND_BREAK_REPAIR_VIA_NONHOMOLOGOUS_END_JOINING	-0.568671	0.00255424
GOBP_REGULATION_OF_GENE_SILENCING_BY_REGULATORY_NCRNA	-0.568671	0.00255424
GOBP_NEGATIVE_REGULATION_OF_TELOMERE_MAINTENANCE_VIA_TELOMERE_LENGTHENING	-0.569164	0.00250941
GOBP_POSITIVE_REGULATION_OF_DOUBLE_STRAND_BREAK_REPAIR	-0.569411	0.00248727
GOBP_POSITIVE_REGULATION_OF_FIBROBLAST_PROLIFERATION	-0.569411	0.00248727
GOBP_POST_TRANSLATIONAL_PROTEIN_MODIFICATION	-0.570028	0.0024327
GOBP_REGULATION_OF_EXIT_FROM_MITOSIS	-0.570521	0.00238984
GOBP_POSITIVE_REGULATION_OF_NUCLEAR_CELL_CYCLE_DNA_REPLICATION	-0.570644	0.00237924
GOBP_PROTEIN_HETEROTETRAMERIZATION	-0.570644	0.00237924
GOBP_NEGATIVE_REGULATION_OF_MRNA_PROCESSING	-0.571014	0.00234768
GOBP_RNA_TEMPLATED_DNA_BIOSYNTHETIC_PROCESS	-0.571014	0.00234768
GOBP_LEUCINE_IMPORT_ACROSS_PLASMA_MEMBRANE	-0.571138	0.00233725
GOBP_HETEROCYCLE_CATABOLIC_PROCESS	-0.571631	0.00229594
GOBP_POSITIVE_REGULATION_OF_CELL_CYCLE_CHECKPOINT	-0.571755	0.00228572
GOBP_REGULATION_OF_MICROTUBULE_POLYMERIZATION_OR_DEPOLYMERIZATION	-0.571755	0.00228572
GOBP_REGULATION_OF_PROTEASOMAL_PROTEIN_CATABOLIC_PROCESS	-0.571755	0.00228572
GOBP_DNA_STRAND_ELONGATION_INVOLVED_IN_DNA_REPLICATION	-0.572248	0.00224525
GOBP_NEGATIVE_REGULATION_OF_CENTROSOME_DUPLICATION	-0.572248	0.00224525
GOBP_POSITIVE_REGULATION_OF_PROTEIN_UBIQUITINATION	-0.572618	0.00221534
GOBP_REGULATION_OF_ORGANELLE_ORGANIZATION	-0.572618	0.00221534
GOBP_NUCLEAR_TRANSCRIBED_MRNA_CATABOLIC_PROCESS	-0.572741	0.00220544
GOBP_5S_CLASS_RRNA_TRANSCRIPTION_BY_RNA_POLYMERASE_III	-0.573111	0.00217602
GOBP_REGULATION_OF_PROTEIN_CATABOLIC_PROCESS	-0.573111	0.00217602
GOBP_DNA_METHYLATION_DEPENDENT_HETEROCHROMATIN_FORMATION	-0.573605	0.00213734
GOBP_TRANSCRIPTION_INITIATION_AT_RNA_POLYMERASE_II_PROMOTER	-0.573851	0.00211825
GOBP_REGULATION_OF_HISTONE_METHYLATION	-0.574221	0.00208989
GOBP_REGULATION_OF_NUCLEAR_CELL_CYCLE_DNA_REPLICATION	-0.574345	0.00208052
GOBP_MATURATION_OF_SSU_RRNA	-0.574591	0.00206189
GOBP_AXIAL_MESODERM_DEVELOPMENT	-0.574838	0.00204341
GOBP_MAMMARY_GLAND_EPITHELIAL_CELL_PROLIFERATION	-0.575208	0.00201599
GOBP_DEVELOPMENT_OF_SECONDARY_FEMALE_SEXUAL_CHARACTERISTICS	-0.575455	0.00199789
GOBP_GLYCOLYTIC_PROCESS_THROUGH_GLUCOSE_6_PHOSPHATE	-0.575455	0.00199789
GOBP_REGULATION_OF_INTRINSIC_APOPTOTIC_SIGNALING_PATHWAY_IN_RESPONSE_TO_DNA_DAMAGE	-0.575455	0.00199789
GOBP_REGULATION_OF_STEM_CELL_DIFFERENTIATION	-0.575455	0.00199789
GOBP_SPINDLE_ELONGATION	-0.575455	0.00199789
GOBP_DNA_STRAND_ELONGATION	-0.575578	0.0019889
GOBP_POSITIVE_REGULATION_OF_INTRINSIC_APOPTOTIC_SIGNALING_PATHWAY_IN_RESPONSE_TO_DNA_DAMAGE	-0.576812	0.00190101
GOBP_NCRNA_PROCESSING	-0.576935	0.00189242
GOBP_REGULATION_OF_TRANSCRIPTION_INVOLVED_IN_G1_S_TRANSITION_OF_MITOTIC_CELL_CYCLE	-0.576935	0.00189242
GOBP_MEIOTIC_SISTER_CHROMATID_COHESION	-0.577058	0.00188387
GOBP_PROTEIN_METHYLATION	-0.577182	0.00187535
GOBP_FEMALE_MEIOTIC_NUCLEAR_DIVISION	-0.577798	0.00183329
GOBP_RIBOSOME_BIOGENESIS	-0.577798	0.00183329
GOBP_CELLULAR_RESPONSE_TO_NITROSATIVE_STRESS	-0.577922	0.00182499
GOBP_MITOCHONDRION_LOCALIZATION	-0.578785	0.00176781
GOBP_POSITIVE_REGULATION_OF_CELL_CYCLE_G2_M_PHASE_TRANSITION	-0.579032	0.00175178
GOBP_SNO_S_RNA_PROCESSING	-0.579278	0.00173589
GOBP_REGULATION_OF_HISTONE_MODIFICATION	-0.579648	0.00171229
GOBP_MITOCHONDRIAL_RNA_3_END_PROCESSING	-0.579895	0.00169673
GOBP_POSITIVE_REGULATION_OF_CYTOKINESIS	-0.580265	0.00167363
GOBP_PYRIMIDINE_NUCLEOSIDE_TRIPHOSPHATE_BIOSYNTHETIC_PROCESS	-0.580759	0.00164327
GOBP_RNA_POLYMERASE_I_PREINITIATION_COMPLEX_ASSEMBLY	-0.580759	0.00164327
GOBP_MRNA_METABOLIC_PROCESS	-0.581005	0.00162829
GOBP_MRNA_MODIFICATION	-0.581499	0.0015987
GOBP_REGULATION_OF_DOSAGE_COMPENSATION_BY_INACTIVATION_OF_X_CHROMOSOME	-0.581622	0.00159138
GOBP_REGULATION_OF_PROTEIN_LOCALIZATION_TO_NUCLEUS	-0.582732	0.00152689
GOBP_POSITIVE_REGULATION_OF_CELL_CYCLE_G1_S_PHASE_TRANSITION	-0.582979	0.00151289
GOBP_POSITIVE_REGULATION_OF_DNA_REPAIR	-0.584952	0.00140509
GOBP_REGULATION_OF_DNA_TEMPLATED_TRANSCRIPTION_INITIATION	-0.584952	0.00140509
GOBP_REGULATION_OF_PROTEOLYSIS_INVOLVED_IN_PROTEIN_CATABOLIC_PROCESS	-0.584952	0.00140509
GOBP_NEGATIVE_REGULATION_OF_SCHWANN_CELL_PROLIFERATION	-0.585692	0.00136653
GOBP_POSITIVE_REGULATION_OF_MITOTIC_NUCLEAR_DIVISION	-0.586062	0.00134762
GOBP_TELOMERASE_HOLOENZYME_COMPLEX_ASSEMBLY	-0.586309	0.00133515
GOBP_REGULATION_OF_CHROMATIN_BINDING	-0.586926	0.00130443
GOBP_MATURATION_OF_5_8S_RRNA	-0.587666	0.00126844
GOBP_POLYADENYLATION_DEPENDENT_RNA_CATABOLIC_PROCESS	-0.587789	0.00126253
GOBP_REGULATION_OF_DNA_TEMPLATED_DNA_REPLICATION_INITIATION	-0.588282	0.00123915
GOBP_MEIOTIC_CHROMOSOME_CONDENSATION	-0.589516	0.00118245
GOBP_HISTONE_H3_K4_METHYLATION	-0.589639	0.00117691
GOBP_NEGATIVE_REGULATION_OF_DOUBLE_STRAND_BREAK_REPAIR_VIA_HOMOLOGOUS_RECOMBINATION	-0.589639	0.00117691
GOBP_REGULATION_OF_ATTACHMENT_OF_SPINDLE_MICROTUBULES_TO_KINETOCHORE	-0.590626	0.00113348
GOBP_REGULATION_OF_MITOCHONDRIAL_RNA_CATABOLIC_PROCESS	-0.590749	0.00112816
GOBP_CHAPERONE_MEDIATED_PROTEIN_FOLDING	-0.590996	0.00111758
GOBP_CELLULAR_RESPONSE_TO_HEAT	-0.591243	0.0011071
GOBP_IMP_BIOSYNTHETIC_PROCESS	-0.591366	0.00110189
GOBP_SPINDLE_MIDZONE_ASSEMBLY	-0.591366	0.00110189
GOBP_RNA_3_END_PROCESSING	-0.591613	0.00109154
GOBP_PYRIMIDINE_RIBONUCLEOSIDE_TRIPHOSPHATE_BIOSYNTHETIC_PROCESS	-0.592106	0.00107112
GOBP_HISTONE_METHYLATION	-0.592229	0.00106607
GOBP_NUCLEAR_PORE_COMPLEX_ASSEMBLY	-0.592353	0.00106104
GOBP_CHROMOSOME_ORGANIZATION_INVOLVED_IN_MEIOTIC_CELL_CYCLE	-0.592476	0.00105603
GOBP_PYRIMIDINE_NUCLEOSIDE_TRIPHOSPHATE_METABOLIC_PROCESS	-0.593093	0.00103132
GOBP_ANIMAL_ORGAN_REGENERATION	-0.59334	0.00102159
GOBP_SNRNA_PROCESSING	-0.59334	0.00102159
GOBP_PROTEIN_LOCALIZATION_TO_CHROMATIN	-0.593586	0.00101195
GOBP_HAIR_FOLLICLE_MATURATION	-0.594573	0.000974204
GOBP_MATURATION_OF_SSU_RRNA_FROM_TRICISTRONIC_RRNA_TRANSCRIPT_SSU_RRNA_5_8S_RRNA_LSU_RRNA	-0.594696	0.00096958
GOBP_DIADENOSINE_POLYPHOSPHATE_METABOLIC_PROCESS	-0.595066	0.000955827
GOBP_MITOCHONDRIAL_GENOME_MAINTENANCE	-0.595683	0.000933309
GOBP_CRD_MEDIATED_MRNA_STABILIZATION	-0.595806	0.000928865
GOBP_REGULATION_OF_PROTEASOMAL_UBIQUITIN_DEPENDENT_PROTEIN_CATABOLIC_PROCESS	-0.59593	0.000924441
GOBP_RIBONUCLEOPROTEIN_COMPLEX_BIOGENESIS	-0.5963	0.000911285
GOBP_REGULATION_OF_DOUBLE_STRAND_BREAK_REPAIR_VIA_HOMOLOGOUS_RECOMBINATION	-0.596546	0.000902612
GOBP_NUCLEOTIDE_SALVAGE	-0.59667	0.000898304
GOBP_MAINTENANCE_OF_SISTER_CHROMATID_COHESION	-0.596916	0.000889746
GOBP_MITOCHONDRIAL_RNA_MODIFICATION	-0.596916	0.000889746
GOBP_CUT_CATABOLIC_PROCESS	-0.59704	0.000885495
GOBP_NEGATIVE_REGULATION_OF_NUCLEAR_TRANSCRIBED_MRNA_CATABOLIC_PROCESS_DEADENYLATION_DEPENDENT_DECAY	-0.59704	0.000885495
GOBP_NEGATIVE_REGULATION_OF_DNA_BIOSYNTHETIC_PROCESS	-0.59741	0.000872856
GOBP_MATURATION_OF_5_8S_RRNA_FROM_TRICISTRONIC_RRNA_TRANSCRIPT_SSU_RRNA_5_8S_RRNA_LSU_RRNA	-0.597656	0.000864524
GOBP_SNORNA_LOCALIZATION	-0.597903	0.000856265
GOBP_REGULATION_OF_STEM_CELL_POPULATION_MAINTENANCE	-0.598027	0.000852164
GOBP_NEGATIVE_REGULATION_OF_UBIQUITIN_PROTEIN_LIGASE_ACTIVITY	-0.599383	0.000808238
GOBP_POSITIVE_REGULATION_OF_CHROMOSOME_SEGREGATION	-0.599383	0.000808238
GOBP_TELOMERASE_RNA_LOCALIZATION	-0.599383	0.000808238
GOBP_REGULATION_OF_HEMATOPOIETIC_PROGENITOR_CELL_DIFFERENTIATION	-0.6	0.000788977
GOBP_SNRNA_METABOLIC_PROCESS	-0.600493	0.000773877
GOBP_DNA_INTEGRITY_CHECKPOINT_SIGNALING	-0.60111	0.000755381
GOBP_CELL_PROLIFERATION_IN_MIDBRAIN	-0.601357	0.000748099
GOBP_HISTONE_DEACETYLATION	-0.60148	0.000744483
GOBP_PROLINE_TRANSPORT	-0.60148	0.000744483
GOBP_MITOTIC_SPINDLE_ORGANIZATION	-0.601603	0.000740882
GOBP_POSITIVE_REGULATION_OF_TELOMERE_MAINTENANCE	-0.601603	0.000740882
GOBP_PROTEIN_K11_LINKED_UBIQUITINATION	-0.601973	0.000730179
GOBP_NEGATIVE_REGULATION_OF_AMIDE_METABOLIC_PROCESS	-0.602097	0.000726643
GOBP_GLUTAMINE_METABOLIC_PROCESS	-0.602714	0.000709204
GOBP_MITOTIC_SPINDLE_ELONGATION	-0.602837	0.000705763
GOBP_METHYLATION	-0.603084	0.000698928
GOBP_REGULATION_OF_CELLULAR_RESPONSE_TO_STRESS	-0.603577	0.000685444
GOBP_TRANSLATIONAL_TERMINATION	-0.6037	0.000682111
GOBP_DNA_REPAIR_DEPENDENT_CHROMATIN_REMODELING	-0.603824	0.000678793
GOBP_REGULATION_OF_RESPIRATORY_GASEOUS_EXCHANGE	-0.60444	0.000662429
GOBP_DOUBLE_STRAND_BREAK_REPAIR_VIA_BREAK_INDUCED_REPLICATION	-0.604934	0.000649604
GOBP_REGULATION_OF_DNA_RECOMBINATION	-0.60518	0.000643279
GOBP_MITOTIC_G2_M_TRANSITION_CHECKPOINT	-0.605427	0.000637011
GOBP_NUCLEIC_ACID_PHOSPHODIESTER_BOND_HYDROLYSIS	-0.60555	0.000633899
GOBP_POSITIVE_REGULATION_OF_DNA_RECOMBINATION	-0.605674	0.000630801
GOBP_PROTEIN_RNA_COMPLEX_ORGANIZATION	-0.60592	0.000624647
GOBP_PROTEIN_LOCALIZATION_TO_NUCLEAR_ENVELOPE	-0.606044	0.000621592
GOBP_NUCLEOBASE_CONTAINING_COMPOUND_TRANSPORT	-0.607031	0.000597644
GOBP_NUCLEAR_BODY_ORGANIZATION	-0.607277	0.000591793
GOBP_NUCLEOTIDE_EXCISION_REPAIR_DNA_GAP_FILLING	-0.607771	0.000580253
GOBP_L_HISTIDINE_TRANSMEMBRANE_TRANSPORT	-0.607894	0.000577401
GOBP_TELOMERE_MAINTENANCE_VIA_TELOMERE_LENGTHENING	-0.608141	0.000571736
GOBP_POSITIVE_REGULATION_OF_CHROMOSOME_SEPARATION	-0.608264	0.000568923
GOBP_POSITIVE_REGULATION_OF_G1_S_TRANSITION_OF_MITOTIC_CELL_CYCLE	-0.609251	0.000546883
GOBP_ENDONUCLEOLYTIC_CLEAVAGE_OF_TRICISTRONIC_RRNA_TRANSCRIPT_SSU_RRNA_5_8S_RRNA_LSU_RRNA	-0.609744	0.000536166
GOBP_CENTRIOLE_CENTRIOLE_COHESION	-0.610114	0.000528257
GOBP_REPRODUCTION	-0.610484	0.000520458
GOBP_CELL_CYCLE_DNA_REPLICATION_INITIATION	-0.610731	0.000515319
GOBP_ADENINE_TRANSPORT	-0.610977	0.000510227
GOBP_POSITIVE_REGULATION_OF_CHROMOSOME_CONDENSATION	-0.611101	0.000507699
GOBP_POSITIVE_REGULATION_OF_TRANSCRIPTION_BY_RNA_POLYMERASE_I	-0.611964	0.000490329
GOBP_POSITIVE_REGULATION_OF_PROTEIN_ACETYLATION	-0.612334	0.000483057
GOBP_RESPONSE_TO_LIGHT_STIMULUS	-0.612334	0.000483057
GOBP_LEUCINE_TRANSPORT	-0.612581	0.000478265
GOBP_SOMATIC_DIVERSIFICATION_OF_IMMUNOGLOBULINS	-0.612828	0.000473518
GOBP_HISTONE_MRNA_CATABOLIC_PROCESS	-0.613198	0.00046648
GOBP_ESTABLISHMENT_OF_SPINDLE_ORIENTATION	-0.613568	0.000459541
GOBP_REGULATION_OF_AMIDE_METABOLIC_PROCESS	-0.613814	0.000454969
GOBP_PROTEIN_ACETYLATION	-0.614061	0.00045044
GOBP_REGULATION_OF_MITOTIC_CELL_CYCLE_SPINDLE_ASSEMBLY_CHECKPOINT	-0.614801	0.000437105
GOBP_REGULATION_OF_TELOMERE_MAINTENANCE_VIA_TELOMERE_LENGTHENING	-0.614801	0.000437105
GOBP_NEGATIVE_REGULATION_OF_TELOMERE_MAINTENANCE_VIA_TELOMERASE	-0.615048	0.000432743
GOBP_AROMATIC_AMINO_ACID_TRANSPORT	-0.615171	0.000430578
GOBP_SIGNAL_TRANSDUCTION_BY_P53_CLASS_MEDIATOR	-0.616775	0.000403339
GOBP_MACROMOLECULE_METHYLATION	-0.617021	0.000399296
GOBP_EPIGENETIC_PROGRAMMING_IN_THE_ZYGOTIC_PRONUCLEI	-0.617761	0.000387393
GOBP_MITOCHONDRIAL_RNA_CATABOLIC_PROCESS	-0.617761	0.000387393
GOBP_EPIGENETIC_REGULATION_OF_GENE_EXPRESSION	-0.617885	0.000385442
GOBP_CELL_CYCLE_CHECKPOINT_SIGNALING	-0.618501	0.000375825
GOBP_TRANSLOCATION_OF_MOLECULES_INTO_HOST	-0.619118	0.000366435
GOBP_DNA_BIOSYNTHETIC_PROCESS	-0.619365	0.000362742
GOBP_PROTEIN_RNA_COMPLEX_DISASSEMBLY	-0.619365	0.000362742
GOBP_GMP_BIOSYNTHETIC_PROCESS	-0.621215	0.00033614
GOBP_REGULATION_OF_CHROMATIN_ORGANIZATION	-0.621338	0.000334434
GOBP_DNA_METHYLATION_ON_CYTOSINE	-0.621708	0.000329364
GOBP_REGULATION_OF_DNA_REPAIR	-0.621832	0.000327691
GOBP_TRANSLATIONAL_INITIATION	-0.621955	0.000326025
GOBP_REGULATION_OF_MICROTUBULE_BASED_PROCESS	-0.622202	0.000322718
GOBP_CELLULAR_RESPONSE_TO_STRESS	-0.623188	0.000309804
GOBP_MITOTIC_CELL_CYCLE_CHECKPOINT_SIGNALING	-0.623188	0.000309804
GOBP_NUCLEOBASE_BIOSYNTHETIC_PROCESS	-0.623312	0.000308225
GOBP_REGULATION_OF_DNA_REPLICATION	-0.623312	0.000308225
GOBP_COP9_SIGNALOSOME_ASSEMBLY	-0.623435	0.000306653
GOBP_GLUTAMINE_TRANSPORT	-0.623558	0.000305089
GOBP_TRNA_TRANSCRIPTION	-0.623558	0.000305089
GOBP_PEPTIDYL_LYSINE_MODIFICATION	-0.624422	0.00029435
GOBP_REGULATION_OF_TRANSCRIPTION_OF_NUCLEOLAR_LARGE_RRNA_BY_RNA_POLYMERASE_I	-0.625655	0.000279628
GOBP_SULFUR_AMINO_ACID_TRANSPORT	-0.626642	0.000268358
GOBP_ESTABLISHMENT_OF_PROTEIN_LOCALIZATION_TO_ORGANELLE	-0.626889	0.000265608
GOBP_MITOTIC_SISTER_CHROMATID_SEPARATION	-0.627999	0.000253564
GOBP_NEGATIVE_REGULATION_OF_NUCLEOBASE_CONTAINING_COMPOUND_METABOLIC_PROCESS	-0.628492	0.000248379
GOBP_PROTEIN_CONTAINING_COMPLEX_ASSEMBLY	-0.628615	0.000247099
GOBP_REGULATION_OF_DOUBLE_STRAND_BREAK_REPAIR	-0.628615	0.000247099
GOBP_RRNA_METABOLIC_PROCESS	-0.628615	0.000247099
GOBP_MEIOTIC_CELL_CYCLE_PROCESS	-0.628739	0.000245825
GOBP_ESTABLISHMENT_OF_MITOTIC_SPINDLE_LOCALIZATION	-0.630096	0.000232217
GOBP_FACULTATIVE_HETEROCHROMATIN_FORMATION	-0.630466	0.000228633
GOBP_SOMATIC_DIVERSIFICATION_OF_IMMUNE_RECEPTORS_VIA_SOMATIC_MUTATION	-0.631206	0.000221622
GOBP_HETEROCHROMATIN_ORGANIZATION	-0.631452	0.00021933
GOBP_POST_TRANSCRIPTIONAL_REGULATION_OF_GENE_EXPRESSION	-0.631452	0.00021933
GOBP_NCRNA_METABOLIC_PROCESS	-0.632686	0.00020821
GOBP_POSITIVE_REGULATION_OF_METAPHASE_ANAPHASE_TRANSITION_OF_CELL_CYCLE	-0.633673	0.000199704
GOBP_SPLICEOSOMAL_SNRNP_ASSEMBLY	-0.633673	0.000199704
GOBP_RESPONSE_TO_HEAT	-0.633919	0.00019763
GOBP_POSITIVE_REGULATION_OF_VIRAL_GENOME_REPLICATION	-0.634043	0.000196601
GOBP_CHROMOSOME_SEPARATION	-0.634659	0.000191532
GOBP_REGULATION_OF_UBIQUITIN_DEPENDENT_PROTEIN_CATABOLIC_PROCESS	-0.634659	0.000191532
GOBP_REGULATION_OF_DNA_TEMPLATED_DNA_REPLICATION	-0.635153	0.000187566
GOBP_V_D_J_RECOMBINATION	-0.635276	0.000186587
GOBP_HISTONE_MRNA_METABOLIC_PROCESS	-0.635399	0.000185613
GOBP_ESTABLISHMENT_OF_MITOTIC_SISTER_CHROMATID_COHESION	-0.636633	0.000176138
GOBP_SIGNAL_TRANSDUCTION_IN_RESPONSE_TO_DNA_DAMAGE	-0.637126	0.000172479
GOBP_REGULATION_OF_MITOTIC_SISTER_CHROMATID_SEGREGATION	-0.637373	0.000170678
GOBP_MICROTUBULE_POLYMERIZATION	-0.637866	0.000167128
GOBP_POSITIVE_REGULATION_OF_TELOMERASE_RNA_LOCALIZATION_TO_CAJAL_BODY	-0.638236	0.000164513
GOBP_PROTEIN_LOCALIZATION_TO_NUCLEOPLASM	-0.63836	0.00016365
GOBP_CELL_CYCLE_DNA_REPLICATION	-0.63947	0.000156077
GOBP_REGULATION_OF_DNA_BIOSYNTHETIC_PROCESS	-0.63947	0.000156077
GOBP_MICROTUBULE_CYTOSKELETON_ORGANIZATION_INVOLVED_IN_MITOSIS	-0.639593	0.000155256
GOBP_DEDIFFERENTIATION	-0.63984	0.000153628
GOBP_MITOTIC_SISTER_CHROMATID_SEGREGATION	-0.64021	0.000151217
GOBP_PROTEIN_LOCALIZATION_TO_CYTOSKELETON	-0.64021	0.000151217
GOBP_RNA_METHYLATION	-0.640333	0.000150421
GOBP_DNA_REPLICATION	-0.640456	0.000149629
GOBP_REGULATION_OF_DNA_DIRECTED_DNA_POLYMERASE_ACTIVITY	-0.641813	0.000141183
GOBP_TRANSCRIPTION_INITIATION_AT_RNA_POLYMERASE_III_PROMOTER	-0.642183	0.00013896
GOBP_NEGATIVE_REGULATION_OF_GENE_EXPRESSION_EPIGENETIC	-0.643047	0.000133906
GOBP_BASIC_AMINO_ACID_TRANSPORT	-0.643417	0.000131794
GOBP_NUCLEOLUS_ORGANIZATION	-0.643417	0.000131794
GOBP_POSITIVE_REGULATION_OF_TRANSCRIPTION_OF_NUCLEOLAR_LARGE_RRNA_BY_RNA_POLYMERASE_I	-0.644403	0.00012632
GOBP_MITOTIC_SISTER_CHROMATID_COHESION	-0.64465	0.000124987
GOBP_NEGATIVE_REGULATION_OF_CHROMOSOME_SEGREGATION	-0.645883	0.000118521
GOBP_NEGATIVE_REGULATION_OF_NUCLEAR_DIVISION	-0.6465	0.000115411
GOBP_DNA_RECOMBINATION	-0.647487	0.0001106
GOBP_POSITIVE_REGULATION_OF_DNA_METABOLIC_PROCESS	-0.64761	0.000110013
GOBP_CHROMATIN_REMODELING	-0.64835	0.000106551
GOBP_POSITIVE_REGULATION_OF_MITOTIC_SISTER_CHROMATID_SEPARATION	-0.648474	0.000105985
GOBP_TRNA_METHYLATION	-0.648597	0.000105421
GOBP_POSITIVE_REGULATION_OF_MITOTIC_CYTOKINESIS	-0.64872	0.000104861
GOBP_PROTEIN_LOCALIZATION_TO_CONDENSED_CHROMOSOME	-0.64872	0.000104861
GOBP_HISTONE_MODIFICATION	-0.64909	0.000103196
GOBP_MRNA_METHYLATION	-0.64909	0.000103196
GOBP_DNA_TOPOLOGICAL_CHANGE	-0.649954	9.94124e-05
GOBP_POSITIVE_REGULATION_OF_CHROMOSOME_ORGANIZATION	-0.649954	9.94124e-05
GOBP_NEGATIVE_REGULATION_OF_DNA_REPLICATION	-0.650077	9.8883e-05
GOBP_CELLULAR_RESPONSE_TO_IONIZING_RADIATION	-0.6502	9.83564e-05
GOBP_TELOMERE_ORGANIZATION	-0.650447	9.73114e-05
GOBP_REGULATION_OF_CHROMOSOME_SEGREGATION	-0.65057	9.67929e-05
GOBP_MEIOTIC_CELL_CYCLE	-0.651187	9.42411e-05
GOBP_MITOTIC_DNA_REPLICATION_CHECKPOINT_SIGNALING	-0.651681	9.22472e-05
GOBP_REGULATION_OF_CELL_CYCLE_CHECKPOINT	-0.652421	8.93337e-05
GOBP_AMP_SALVAGE	-0.652667	8.83828e-05
GOBP_REGULATION_OF_TRANSCRIPTION_BY_RNA_POLYMERASE_I	-0.653037	8.6975e-05
GOBP_ESTABLISHMENT_OF_SISTER_CHROMATID_COHESION	-0.653161	8.65106e-05
GOBP_ORGANELLE_FISSION	-0.653407	8.55892e-05
GOBP_MATURATION_OF_LSU_RRNA_FROM_TRICISTRONIC_RRNA_TRANSCRIPT_SSU_RRNA_5_8S_RRNA_LSU_RRNA	-0.654024	8.33277e-05
GOBP_DOUBLE_STRAND_BREAK_REPAIR	-0.654271	8.24396e-05
GOBP_MITOTIC_CHROMOSOME_CONDENSATION	-0.654517	8.15609e-05
GOBP_NEGATIVE_REGULATION_OF_SISTER_CHROMATID_COHESION	-0.654517	8.15609e-05
GOBP_POSITIVE_REGULATION_OF_PROTEIN_MODIFICATION_BY_SMALL_PROTEIN_CONJUGATION_OR_REMOVAL	-0.654641	8.1125e-05
GOBP_REGULATION_OF_UBIQUITIN_PROTEIN_LIGASE_ACTIVITY	-0.654641	8.1125e-05
GOBP_RESPONSE_TO_X_RAY	-0.654641	8.1125e-05
GOBP_DNA_TEMPLATED_DNA_REPLICATION	-0.656121	7.60699e-05
GOBP_DNA_REPLICATION_CHECKPOINT_SIGNALING	-0.656368	7.52582e-05
GOBP_PROTEIN_HETEROOLIGOMERIZATION	-0.656861	7.36603e-05
GOBP_REGULATION_OF_ESTABLISHMENT_OF_PROTEIN_LOCALIZATION_TO_CHROMOSOME	-0.657108	7.28739e-05
GOBP_POSITIVE_REGULATION_OF_PROTEIN_LOCALIZATION_TO_NUCLEUS	-0.657354	7.20959e-05
GOBP_PROTEIN_DNA_COMPLEX_ORGANIZATION	-0.658464	6.86953e-05
GOBP_DNA_REPAIR	-0.659204	6.6517e-05
GOBP_SPINDLE_ORGANIZATION	-0.659328	6.61607e-05
GOBP_REGULATION_OF_MITOTIC_CYTOKINESIS	-0.659574	6.54537e-05
GOBP_REGULATION_OF_DNA_DAMAGE_CHECKPOINT	-0.660068	6.40622e-05
GOBP_REGULATION_OF_RNA_BINDING	-0.660685	6.2364e-05
GOBP_REGULATION_OF_TRANSLATIONAL_INITIATION	-0.660808	6.20298e-05
GOBP_MICROTUBULE_BASED_PROCESS	-0.661548	6.00616e-05
GOBP_SOMATIC_DIVERSIFICATION_OF_IMMUNE_RECEPTORS	-0.661671	5.97397e-05
GOBP_NUCLEAR_EXPORT	-0.661795	5.94195e-05
GOBP_SISTER_CHROMATID_COHESION	-0.661918	5.9101e-05
GOBP_ESTABLISHMENT_OF_PROTEIN_LOCALIZATION_TO_TELOMERE	-0.662288	5.81557e-05
GOBP_NEGATIVE_REGULATION_OF_CELL_CYCLE_CHECKPOINT	-0.662288	5.81557e-05
GOBP_REGULATION_OF_UBIQUITIN_PROTEIN_TRANSFERASE_ACTIVITY	-0.662658	5.72254e-05
GOBP_NON_MEMBRANE_BOUNDED_ORGANELLE_ASSEMBLY	-0.662905	5.66135e-05
GOBP_SPLICEOSOMAL_TRI_SNRNP_COMPLEX_ASSEMBLY	-0.662905	5.66135e-05
GOBP_TRANSCRIPTION_BY_RNA_POLYMERASE_I	-0.663398	5.54092e-05
GOBP_RECOMBINATIONAL_REPAIR	-0.663521	5.51122e-05
GOBP_MITOTIC_NUCLEAR_DIVISION	-0.664015	5.39398e-05
GOBP_SISTER_CHROMATID_SEGREGATION	-0.664261	5.3363e-05
GOBP_MICROTUBULE_DEPOLYMERIZATION	-0.664508	5.27923e-05
GOBP_MRNA_3_END_PROCESSING_BY_STEM_LOOP_BINDING_AND_CLEAVAGE	-0.665002	5.16693e-05
GOBP_CHROMOSOME_ORGANIZATION	-0.665248	5.11168e-05
GOBP_REGULATION_OF_CYCLIN_DEPENDENT_PROTEIN_KINASE_ACTIVITY	-0.665372	5.08428e-05
GOBP_MAINTENANCE_OF_CELL_NUMBER	-0.666112	4.92293e-05
GOBP_FIBROBLAST_PROLIFERATION	-0.666235	4.89655e-05
GOBP_MEIOTIC_SPINDLE_ORGANIZATION	-0.666358	4.8703e-05
GOBP_REGULATION_OF_PROTEIN_NEDDYLATION	-0.666358	4.8703e-05
GOBP_ESTABLISHMENT_OF_PROTEIN_LOCALIZATION_TO_CHROMOSOME	-0.666852	4.76672e-05
GOBP_NEGATIVE_REGULATION_OF_DNA_METABOLIC_PROCESS	-0.667098	4.71577e-05
GOBP_NUCLEOLAR_LARGE_RRNA_TRANSCRIPTION_BY_RNA_POLYMERASE_I	-0.667222	4.69049e-05
GOBP_PROTEIN_LOCALIZATION_TO_CHROMOSOME	-0.667715	4.59076e-05
GOBP_MITOTIC_DNA_REPLICATION	-0.668578	4.42133e-05
GOBP_REGULATION_OF_DNA_METABOLIC_PROCESS	-0.669812	4.19015e-05
GOBP_NCRNA_TRANSCRIPTION	-0.669935	4.16772e-05
GOBP_CELLULAR_RESPONSE_TO_LIGHT_STIMULUS	-0.670429	4.07918e-05
GOBP_POSITIVE_REGULATION_OF_DNA_BIOSYNTHETIC_PROCESS	-0.671415	3.90777e-05
GOBP_MICROTUBULE_POLYMERIZATION_OR_DEPOLYMERIZATION	-0.671539	3.88686e-05
GOBP_REGULATION_OF_MITOTIC_NUCLEAR_DIVISION	-0.672525	3.72362e-05
GOBP_REGULATION_OF_PROTEIN_LOCALIZATION_TO_CHROMOSOME_TELOMERIC_REGION	-0.672525	3.72362e-05
GOBP_DNA_TEMPLATED_TRANSCRIPTION_INITIATION	-0.673142	3.62514e-05
GOBP_REGULATION_OF_TELOMERE_MAINTENANCE	-0.673759	3.52931e-05
GOBP_REGULATION_OF_NUCLEOCYTOPLASMIC_TRANSPORT	-0.674006	3.49169e-05
GOBP_POSITIVE_REGULATION_OF_CELL_CYCLE_PROCESS	-0.674129	3.47304e-05
GOBP_REGULATION_OF_NUCLEAR_DIVISION	-0.674499	3.41769e-05
GOBP_CELLULAR_RESPONSE_TO_GAMMA_RADIATION	-0.674992	3.34528e-05
GOBP_PROTEIN_LOCALIZATION_TO_NUCLEAR_BODY	-0.674992	3.34528e-05
GOBP_POSITIVE_REGULATION_OF_ESTABLISHMENT_OF_PROTEIN_LOCALIZATION_TO_TELOMERE	-0.675732	3.23958e-05
GOBP_PROTEIN_LOCALIZATION_TO_ORGANELLE	-0.675732	3.23958e-05
GOBP_CHROMOSOME_SEGREGATION	-0.675979	3.20511e-05
GOBP_BLASTOCYST_GROWTH	-0.676966	3.07091e-05
GOBP_CELLULAR_RESPONSE_TO_UV	-0.677089	3.05455e-05
GOBP_PROTEIN_NEDDYLATION	-0.677212	3.03827e-05
GOBP_RESPONSE_TO_COCAINE	-0.677336	3.02208e-05
GOBP_REGULATION_OF_CELL_DIVISION	-0.677582	2.98997e-05
GOBP_PURINE_NUCLEOBASE_BIOSYNTHETIC_PROCESS	-0.677706	2.97404e-05
GOBP_NUCLEAR_CHROMOSOME_SEGREGATION	-0.679186	2.78955e-05
GOBP_REGULATION_OF_SISTER_CHROMATID_SEGREGATION	-0.680296	2.65889e-05
GOBP_DNA_DAMAGE_RESPONSE	-0.680913	2.58903e-05
GOBP_DNA_METABOLIC_PROCESS	-0.681159	2.56162e-05
GOBP_POST_CHAPERONIN_TUBULIN_FOLDING_PATHWAY	-0.681776	2.49437e-05
GOBP_POST_FERTILIZATION_EPIGENETIC_REGULATION_OF_GENE_EXPRESSION	-0.682886	2.37786e-05
GOBP_NEGATIVE_REGULATION_OF_MITOTIC_CELL_CYCLE_PHASE_TRANSITION	-0.683503	2.31556e-05
GOBP_POSITIVE_REGULATION_OF_CELL_CYCLE_PHASE_TRANSITION	-0.683873	2.27899e-05
GOBP_MICROTUBULE_CYTOSKELETON_ORGANIZATION	-0.683996	2.26693e-05
GOBP_NEGATIVE_REGULATION_OF_UBIQUITIN_PROTEIN_TRANSFERASE_ACTIVITY	-0.684613	2.20761e-05
GOBP_RESPONSE_TO_UV	-0.684983	2.17279e-05
GOBP_POSITIVE_REGULATION_OF_AMIDE_METABOLIC_PROCESS	-0.687573	1.94433e-05
GOBP_NEGATIVE_REGULATION_OF_CELL_CYCLE_G2_M_PHASE_TRANSITION	-0.68856	1.86394e-05
GOBP_MRNA_EXPORT_FROM_NUCLEUS	-0.688807	1.84438e-05
GOBP_TRANSCRIPTION_DEPENDENT_TETHERING_OF_RNA_POLYMERASE_II_GENE_DNA_AT_NUCLEAR_PERIPHERY	-0.689053	1.82504e-05
GOBP_DNA_CONFORMATION_CHANGE	-0.689177	1.81544e-05
GOBP_ISOLEUCINE_TRANSPORT	-0.690657	1.70427e-05
GOBP_SCARNA_LOCALIZATION_TO_CAJAL_BODY	-0.690657	1.70427e-05
GOBP_DNA_UNWINDING_INVOLVED_IN_DNA_REPLICATION	-0.690903	1.68644e-05
GOBP_POSITIVE_REGULATION_OF_RNA_BINDING	-0.691027	1.67759e-05
GOBP_REGULATION_OF_CYTOKINESIS	-0.69115	1.6688e-05
GOBP_REGULATION_OF_SISTER_CHROMATID_COHESION	-0.691274	1.66005e-05
GOBP_NEGATIVE_REGULATION_OF_CHROMOSOME_ORGANIZATION	-0.691397	1.65134e-05
GOBP_MRNA_TRANSPORT	-0.691767	1.62551e-05
GOBP_NEGATIVE_REGULATION_OF_ORGANELLE_ORGANIZATION	-0.69189	1.617e-05
GOBP_ESTABLISHMENT_OF_RNA_LOCALIZATION	-0.692507	1.5751e-05
GOBP_TELOMERE_MAINTENANCE	-0.692877	1.5505e-05
GOBP_OXIDATIVE_RNA_DEMETHYLATION	-0.69411	1.47131e-05
GOBP_TUBULIN_COMPLEX_ASSEMBLY	-0.694974	1.41836e-05
GOBP_RRNA_TRANSCRIPTION	-0.696207	1.34609e-05
GOBP_POLYAMINE_BIOSYNTHETIC_PROCESS	-0.696701	1.31825e-05
GOBP_POSITIVE_REGULATION_OF_TRANSLATIONAL_INITIATION	-0.698181	1.23821e-05
GOBP_PURINE_RIBONUCLEOTIDE_SALVAGE	-0.698181	1.23821e-05
GOBP_IMPORT_INTO_NUCLEUS	-0.700894	1.10413e-05
GOBP_PROTEIN_MODIFICATION_BY_SMALL_PROTEIN_REMOVAL	-0.701881	1.05912e-05
GOBP_PROTEIN_LOCALIZATION_TO_CHROMOSOME_TELOMERIC_REGION	-0.702128	1.04816e-05
GOBP_DNA_REPLICATION_INITIATION	-0.702744	1.02126e-05
GOBP_INNER_CELL_MASS_CELL_PROLIFERATION	-0.704101	9.64516e-06
GOBP_NEGATIVE_REGULATION_OF_CELL_CYCLE_PROCESS	-0.705705	9.01524e-06
GOBP_REGULATION_OF_CELL_CYCLE_PROCESS	-0.706075	8.87583e-06
GOBP_REGULATION_OF_CELL_CYCLE_G2_M_PHASE_TRANSITION	-0.706691	8.64824e-06
GOBP_REGULATION_OF_CHROMOSOME_ORGANIZATION	-0.706938	8.55884e-06
GOBP_POSITIVE_REGULATION_OF_MITOTIC_CELL_CYCLE_PHASE_TRANSITION	-0.707925	8.21033e-06
GOBP_POSITIVE_REGULATION_OF_CELL_CYCLE	-0.708048	8.16777e-06
GOBP_NEGATIVE_REGULATION_OF_DNA_REPAIR	-0.708295	8.0833e-06
GOBP_CELL_CYCLE_G1_S_PHASE_TRANSITION	-0.709282	7.75394e-06
GOBP_NEGATIVE_REGULATION_OF_MITOTIC_CELL_CYCLE	-0.711132	7.17152e-06
GOBP_RNA_LOCALIZATION	-0.712118	6.87855e-06
GOBP_CELL_DIVISION	-0.714092	6.32682e-06
GOBP_MITOTIC_CELL_CYCLE_PROCESS	-0.715942	5.84807e-06
GOBP_RNA_EXPORT_FROM_NUCLEUS	-0.716189	5.78688e-06
GOBP_PROTEIN_LOCALIZATION_TO_NUCLEUS	-0.716559	5.69622e-06
GOBP_NEGATIVE_REGULATION_OF_CELL_CYCLE	-0.718409	5.26238e-06
GOBP_REGULATION_OF_CELL_CYCLE	-0.718656	5.2069e-06
GOBP_POSITIVE_REGULATION_OF_TRANSCRIPTION_BY_RNA_POLYMERASE_III	-0.719519	5.01689e-06
GOBP_POSITIVE_REGULATION_OF_PROTEIN_NEDDYLATION	-0.721492	4.6059e-06
GOBP_CELL_CYCLE	-0.723096	4.29432e-06
GOBP_CELL_CYCLE_PROCESS	-0.723219	4.27114e-06
GOBP_MITOTIC_CELL_CYCLE	-0.725069	3.93615e-06
GOBP_REGULATION_OF_CELL_CYCLE_PHASE_TRANSITION	-0.726673	3.66418e-06
GOBP_NEGATIVE_REGULATION_OF_PROTEIN_UBIQUITINATION	-0.727166	3.58373e-06
GOBP_CELL_CYCLE_PHASE_TRANSITION	-0.727783	3.48522e-06
GOBP_REGULATION_OF_MITOTIC_CELL_CYCLE_PHASE_TRANSITION	-0.731237	2.9731e-06
GOBP_MITOTIC_CELL_CYCLE_PHASE_TRANSITION	-0.73321	2.70808e-06
GOBP_CELL_CYCLE_G2_M_PHASE_TRANSITION	-0.733703	2.64471e-06
GOBP_CELLULAR_RESPONSE_TO_RADIATION	-0.733827	2.62904e-06
GOBP_TRANSCRIPTION_BY_RNA_POLYMERASE_III	-0.7358	2.38744e-06
GOBP_NUCLEAR_TRANSPORT	-0.73839	2.09476e-06
GOBP_NEGATIVE_REGULATION_OF_POST_TRANSLATIONAL_PROTEIN_MODIFICATION	-0.740487	1.87637e-06
GOBP_POSITIVE_REGULATION_OF_POST_TRANSLATIONAL_PROTEIN_MODIFICATION	-0.743447	1.59359e-06
GOBP_REGULATION_OF_MITOTIC_CELL_CYCLE	-0.745174	1.44127e-06
GOBP_REGULATION_OF_PROTEIN_UBIQUITINATION	-0.754918	7.28485e-07
GOBP_POSITIVE_REGULATION_OF_MITOTIC_CELL_CYCLE	-0.761702	3.51907e-07
GOBP_REGULATION_OF_TRANSCRIPTION_BY_RNA_POLYMERASE_III	-0.770213	0
GOBP_RESPONSE_TO_IONIZING_RADIATION	-0.772186	0
GOBP_REGULATION_OF_POST_TRANSLATIONAL_PROTEIN_MODIFICATION	-0.77527	0
GOBP_RESPONSE_TO_RADIATION	-0.77934	0
GOBP_POSITIVE_REGULATION_OF_TRANSLATION	-0.784397	0
GOBP_RESPONSE_TO_GAMMA_RADIATION	-0.813753	0

## Sheet: Cor
Epithelial structure maintenance				Flavonoid metabolic process				Response to gamma radiation
gene symbol	correlation coefficient	p-value		gene symbol	correlation coefficient	p-value		gene symbol	correlation coefficient	p-value
MUC2	0.845528	1.43307e-13		SULT1B1	0.703704	4.89587e-08		TREX1	0.369799	0.0114242
MUC4	0.809751	9.48992e-12		UGT1A1;UGT1A3;UGT1A7;UGT1A8;UGT1A9;UGT1A10	0.651297	9.50908e-07		BCL2	0.346908	0.0181785
ILDR1	0.739071	4.48748e-09		SULT1A1;SULT1A3;SULT1A4	0.646801	1.19461e-06		APOBEC1	0.271343	0.06814
TFF3	0.696168	7.79372e-08		SULT1C4	0.135765	0.368315		PRKAA1	0.247353	0.0974542
TFF1	0.605802	8.15305e-06		CYP1A1	0.0999758	0.508569		PTPRC	0.110624	0.464237
MUC13	0.543759	9.40035e-05		LCT	-0.00442982	0.976691		CDKN1A	0.077879	0.60694
PBLD	0.517659	0.000229325						ERCC6	0.0692771	0.647326
CRACD	0.489792	0.000550608						MDM2	0.0387505	0.798197
SERPINA3	0.451511	0.00163486						TP53	0.0122569	0.935565
INAVA	0.397896	0.00617238						HSF1	-0.029579	0.845286
SLC22A5	0.370598	0.011234						CRYAB	-0.0311699	0.837075
LSR	0.335396	0.0226906						WRN	-0.0563144	0.710096
VSIG1	0.319018	0.0306991						GTF2H5	-0.074264	0.62378
NEUROD1	0.270816	0.0686983						BAX	-0.0752141	0.619335
MUC6	0.198863	0.1852						ZMPSTE24	-0.0920949	0.542707
PIWIL4	0.190847	0.203915						BAK1	-0.107752	0.475983
TFF2	0.188007	0.210852						ATM	-0.120223	0.426124
RBP4	0.184646	0.219274						TIGAR	-0.127546	0.398274
LACRT	0.129418	0.391326						XRCC5	-0.134361	0.373334
CXADR	0.102265	0.49886						LIG4	-0.160152	0.287695
IL10RA	0.0997019	0.509737						H2AX	-0.162736	0.279885
TLR4	0.0832979	0.58207						TSPYL5	-0.224101	0.134337
SRF	0.0550494	0.716333						FANCD2	-0.239296	0.109226
HTR4	0.0161569	0.915128						MIR21	-0.245438	0.100158
IL17A	-0.00958074	0.949613						EGR1	-0.245842	0.0995831
TLR9	-0.0167501	0.912024						ELK1	-0.269603	0.0699974
SOX9	-0.105177	0.486651						IL1A	-0.276087	0.0632743
LDB2	-0.181894	0.226341						CBL	-0.285298	0.0546198
ZNF830	-0.244996	0.100791						GPX1	-0.29049	0.0501783
NOD2	-0.246298	0.0989361						ATR	-0.309417	0.0363968
LDB1	-0.28465	0.0551957						PARP1	-0.31068	0.0356008
MKS1	-0.292019	0.0489276						BCL2L1	-0.326743	0.0266702
CROCC	-0.453733	0.00153995						PML	-0.334874	0.0229153
STRAP	-0.48195	0.000695297						XRCC2	-0.344943	0.01889
								CHEK2	-0.353489	0.0159581
								XRCC6	-0.382187	0.00876418
								CXCL10	-0.386615	0.00795273
								YAP1	-0.398215	0.00612759
								HRAS	-0.41141	0.00450433
								KDM1A	-0.413014	0.00433527
								SOD2	-0.415089	0.00412487
								DCUN1D3	-0.42084	0.00358772
								TMEM109	-0.423344	0.00337377
								TLK2	-0.429487	0.00289557
								POLB	-0.450334	0.00168719
								MEN1	-0.47449	0.000863662
								BRCA2	-0.520822	0.000206621
								MYC	-0.528451	0.000160004
								PRKDC	-0.541235	0.000102803
								MAP3K20	-0.541653	0.000101294
								RPL26	NA	NA
